# Supplementary material for: Realizing the potential of social determinants data in EHR systems: A scoping review of approaches for screening, linkage, extraction, analysis, and interventions
Source: PubMed Central journal article supplement (PMC11523026; doi:10.1017/cts.2024.571), 2024-10-10
Supplement: S2059866124005715sup002.pdf [file S2059866124005715sup002.pdf]

| EndNote_ID | PubMed_ID | Title                                                                                                                                                                          | Involved Data Elements                                                                                                                                                                                                                   | Tool Name                                                     | Vendor-specific / home-grown | Target population                                                                                                                                           | Screening settings                                                                      | Active/Passive                                   | personal/structural              | personal/structural-clean | Remarks |
|------------|-----------|--------------------------------------------------------------------------------------------------------------------------------------------------------------------------------|------------------------------------------------------------------------------------------------------------------------------------------------------------------------------------------------------------------------------------------|---------------------------------------------------------------|------------------------------|-------------------------------------------------------------------------------------------------------------------------------------------------------------|-----------------------------------------------------------------------------------------|--------------------------------------------------|----------------------------------|---------------------------|---------|
| 144        | 34210842  | An Ecological Model to Frame the Delivery of Pediatric Preventive Care                                                                                                         | Socioeconomic status, social and physical disorder, access to services and amenities, organization of social networks, safety                                                                                                            | Community-level data aggregation                              | Home-grown                   | Children                                                                                                                                                    | Primary care, community settings, population level                                      | Active                                           | structural                       | structural                |         |
| 157        | 34628675  | Evaluation of the Core 5 Social Determinants of Health Screening Tool                                                                                                          | Financial resource strain, transportation, stress, depression, intimate partner violence, social isolation, physical activity, alcohol use                                                                                               | 11-question paper questionnaire                               | Home-grown                   | Adult patients (18+) receiving Medicare wellness, adult wellness, or new patient visits                                                                     | Single adult ambulatory clinic within a large integrated health network                 | Active                                           | Personal and structural          | both                      |         |
| 209        | 30201636  | Adoption of Social Determinants of Health Ehr Tools by Community Health Centers                                                                                                | Housing, food, transportation, education, income, safety, social connections, stress, depression                                                                                                                                         | 14 questions based on PRAPARE and NAM recommendations         | Home-grown                   | Adult patients at community health centers                                                                                                                  | 3 community health centers using shared EHR system                                      | Active - staff administered paper questionnaire  | Both personal and structural     | both                      |         |
| 217        | 32350005  | Differences in Pediatric Residents' Social Needs Screening Practices across Health Care Settings                                                                               | Food, housing, education, intimate partner violence, legal needs, maternal depression                                                                                                                                                    | Not specified                                                 | Not specified                | Pediatric patients                                                                                                                                          | Inpatient and outpatient care at an academic children's hospital and affiliated clinics | Active - residents self-reported screening rates | Mainly personal                  | personal                  |         |
| 219        | 30898498  | Screening for the Social and Behavioral Determinants of Health at a School-Based Clinic                                                                                        | Depression, anxiety, tobacco use, alcohol/drug use, violence, food insecurity, health literacy, nutrition, physical activity, sexual health                                                                                              | Custom screening set assembled from validated tools           | Home-grown                   | Adolescent students                                                                                                                                         | School-based health clinic                                                              | Active - administered by provider                | Mainly personal                  | personal                  |         |
| 255        | 35037885  | Social Determinants of Health Screening by Preclinical Medical Students During the Covid-19 Pandemic: Service-Based Learning Case Study                                        | Housing instability, utility strain, food insecurity, transportation, financial resources strain, exposure to violence, childcare, behavioral and mental health                                                                          | 10-item Social Determinants of Health Screening Questionnaire | Home-grown                   | Patients aged ≥50 years who were due for colorectal cancer screening and did not have insurance                                                             | Telephone screening                                                                     | Active screening                                 | Focused on personal determinants | personal                  |         |
| 259        | 36779911  | Partner-Developed Electronic Health Record Tools to Facilitate Social Risk-Informed Care Planning                                                                              | Housing insecurity, food insecurity, transportation needs, inability to afford medications/medical care, exposure to violence                                                                                                            | Suite of clinical decision support tools embedded in Epic EHR | Home-grown                   | Patients with hypertension and/or type 2 diabetes in community health centers                                                                               | Primary care visits                                                                     | Active screening                                 | Focused on personal determinants | personal                  |         |
| 317        | 35692849  | A Local Perspective into Electronic Health Record Design, Integration, and Implementation of Screening and Referral for Social Determinants of Health                          | Housing instability, food insecurity, transportation, utilities, interpersonal safety                                                                                                                                                    | CMS Health-Related Social Needs (HRSNs) Screening Tool        | Home-grown                   | Medicare and Medicaid beneficiaries                                                                                                                         | Inpatient, outpatient, emergency department                                             | Active screening                                 | Focused on personal determinants | personal                  |         |
| 328        | 32663083  | Universal Screening of Social Determinants of Health at a Large Us Academic Medical Center, 2018                                                                               | Housing instability, food insecurity, transportation, utilities, safety                                                                                                                                                                  | CMS Accountable Health Communities Screening Tool             | Home-grown                   | Dual-beneficiary patients in pediatrics, internal medicine, obstetrics/gynecology primary care practices                                                    | Primary care practices                                                                  | Active screening                                 | Focused on personal determinants | personal                  |         |
| 365        | 34952582  | Evaluation of a Social Determinants of Health Screening Questionnaire and Workflow Pilot within an Adult Ambulatory Clinic                                                     | Financial resource needs, transportation needs, stress, depression, intimate partner violence, social connections, physical activity, alcohol consumption                                                                                | 11-question paper questionnaire adapted from Epic EHR system  | Home-grown                   | Adult patients with Medicare wellness, annual, new or transfer patient visits                                                                               | Ambulatory clinic                                                                       | Active screening                                 | Focused on personal determinants | personal                  |         |
| 384        | 35779742  | The Utility of the Brokamp Area Deprivation Index as a Prescreen for Social Risk in Primary Care                                                                               | Food insecurity, utility needs, housing instability, childcare, financial resource strain, transportation challenges, health literacy, social isolation                                                                                  | HLSN                                                          | Home-grown                   | Pediatric Patient Families who spoke English, Spanish, or Arabic and had a child ≤12 years receiving primary care                                           | Primary care at a large academic institution                                            | Active                                           | Mainly personal                  | personal                  |         |
| 404        | 32553071  | Implementing a Social Determinants Screening and Referral Infrastructure During Routine Emergency Department Visits, Utah, 2017-2018                                           | Housing and utilities, food assistance, transportation needs, legal resources, mental health and addiction services, medical, dental, and vision insurance, employment services, education and training, and domestic violence and abuse | 10 questions based on HealthLeads with modifications          | Home-grown                   | Emergency department patients                                                                                                                               | Post-Triage, discharge time, check-out                                                  | Active                                           | Personal and structural          | both                      |         |
| 431        | 31753281  | Variation in Electronic Health Record Documentation of Social Determinants of Health across a National Network of Community Health Centers                                     | Financial resource strain, food insecurity, housing insecurity, inadequate physical activity, relationship safety, social isolation, stress                                                                                              | 15 questions based on PRAPARE and NAM recommendations         | Vendor-specific              | Primary care or mental or behavioral health visit                                                                                                           | EHR-based SDH screening tool in a national network of more than 100 CHCs                | Active                                           | Mainly personal                  | personal                  |         |
| 436        | 36729786  | Understanding the Role of a Technology and Emr-Based Social Determinants of Health Screening Tool and Community-Based Resource Connections in Health Care Resource Utilization | Food insecurity, housing instability, utility insecurity, transportation needs, financial instability, violence/abuse, language/educational needs, health literacy, and social connectedness                                             | 13-item questionnaire (NowPow)                                | Not specified                | Patients (18 y+) in South Carolina's central (Midlands) and northwestern (Upstate) regions, engaged in one of three care and population management programs | South Carolina's largest private nonprofit health system                                | Active                                           | Mainly personal                  | personal                  |         |
| 507        | 30993632  | Screening for Housing Instability: Providers' Reflections on Addressing a Social Determinant of Health                                                                         | Housing                                                                                                                                                                                                                                  | HSCR                                                          | Home-grown                   | Eligible veterans                                                                                                                                           | All outpatient clinics                                                                  | Active                                           | Personal                         | personal                  |         |
| 574        | 28241787  | Using Self-Reported Data on the Social Determinants of Health in Primary Care to Identify Cancer Screening Disparities: Opportunities and Challenges                           | Immigrant status, ethnicity, household income and number of people in the household, sexual orientation, preferred language of communication, and housing status                                                                         | 11-questions survey                                           | Home-grown                   | Patients who were eligible for at least one of the three cancer screening types                                                                             | In the waiting room at routine office visits                                            | Active                                           | Personal                         | personal                  |         |
| 581        | 34592935  | Implementation of Targeted Screening for Poverty in a Large Primary Care Team in Toronto, Canada: A Feasibility Study                                                          | Poverty                                                                                                                                                                                                                                  | 2 screening questions                                         | Home-grown                   | Patients had at least one primary care visit over the three previous years, and were living in the most deprived neighborhoods.                             | A large family health team                                                              | Active                                           | Personal                         | personal                  |         |

| EndNote_ID | PubMed_ID | Title                                                                                                                                                   | Institution name                                     | Tool Name                  | SDoH elements included                                                                                                                                                | Collection Method                                                                                                                     | collection frequency                                         | Interplay with electronic health records.(Yes/No)                                           | linking dataset |
|------------|-----------|---------------------------------------------------------------------------------------------------------------------------------------------------------|------------------------------------------------------|----------------------------|-----------------------------------------------------------------------------------------------------------------------------------------------------------------------|---------------------------------------------------------------------------------------------------------------------------------------|--------------------------------------------------------------|---------------------------------------------------------------------------------------------|-----------------|
| 128        | 31095052  | Implementing an Ehr-Based Screening and Referral System to Address Social Determinants of Health in Primary Care                                        | Boston Medical Center                                | THRIVE                     | Homelessness, housing insecurity, food insecurity, inability to afford medications, lack of transportation, utilities, caregiving, unemployment, education            | Paper screening form entered into EHR by medical assistants                                                                           | One time screening for new patients at first visit           | Yes - Screening responses mapped to ICD-10 codes and orders in EHR to print referral guides |                 |
| 136        | 34549294  | Documentation and Review of Social Determinants of Health Data in the Ehr: Measures and Associated Insights                                             | UCSF Health                                          | Not specified              | Housing, food insecurity, transportation, financial strain                                                                                                            | Structured fields (patient social history questions, problem list Z-codes), free text fields (social history text, social work notes) | Varied based on data type, some one-time, some per encounter | Yes - focused on documentation in and review of data in the EHR                             |                 |
| 141        | 35446610  | Linking Electronic Health Records to the American Community Survey: Feasibility and Process                                                             |                                                      |                            |                                                                                                                                                                       |                                                                                                                                       |                                                              |                                                                                             |                 |
| 149        | 34312264  | Purposeful Incorporation of Patient Narratives in the Medical Record in the Netherlands                                                                 | Dutch Practice-Based Research Network (FaMe-Net)     | Context survey             | Education level, employment status, traumatic events/abuse, family medical history                                                                                    | Self-reported survey                                                                                                                  | Updated every 2 years                                        | Yes - Added to EHR                                                                          |                 |
| 156        | 35662804  | Social Determinants of Health Data Availability for Patients with Eye Conditions                                                                        | University of California, San Diego                  | Local EHR database (Epic)  | Tobacco use, alcohol use, drug use, education, financial strain, living situation, stress level, socialization, physical activity, food insecurity, transportation    | ICD codes, discrete data fields                                                                                                       | Ongoing during clinical encounters                           | Yes                                                                                         |                 |
|            |           |                                                                                                                                                         | National Institutes of Health                        | All of Us Research Program | Demographics, social isolation, overall health, income, housing, healthcare access, food security, education, lifestyle                                               | One-time at enrollment, ongoing                                                                                                       | Yes                                                          |                                                                                             |                 |
| 165        | 36454231  | Screening for Social Determinants of Health: Active and Passive Information Retrieval Methods                                                           | OSF HealthCare System                                | Pieces NLP system          | Social integration, domestic safety, education, financial resources, food insecurity, transportation, housing, stress, behavioral health, substance abuse, disability | Passive - NLP of EHR notes                                                                                                            | Passive - Retrospective                                      | Yes                                                                                         |                 |
|            |           |                                                                                                                                                         |                                                      |                            |                                                                                                                                                                       | Active - Digital screening questionnaire                                                                                              | Active - At clinic visits                                    |                                                                                             |                 |
| 168        | 29385988  | A Patient and Family Data Domain Collection Framework for Identifying Disparities in Pediatrics: Results from the Pediatric Health Equity Collaborative | Multiple pediatric hospitals in US and Canada (PHEC) | Not specified              | Race/ethnicity, language, sexual orientation, gender identity, disability, social determinants of health                                                              | Survey/questionnaire                                                                                                                  | Not specified                                                | Yes                                                                                         |                 |

|     |          |                                                                                                                        |                                                                                                                             |                                                                                                                           |                                                                                                                                                                |                                                                                         |                                |                                                                                        |
|-----|----------|------------------------------------------------------------------------------------------------------------------------|-----------------------------------------------------------------------------------------------------------------------------|---------------------------------------------------------------------------------------------------------------------------|----------------------------------------------------------------------------------------------------------------------------------------------------------------|-----------------------------------------------------------------------------------------|--------------------------------|----------------------------------------------------------------------------------------|
| 173 | 35854720 | Advancing Interoperability of Patient-Level Social Determinants of Health Data to Support Covid-19 Research            | N3C Institutions                                                                                                            | THRIVE                                                                                                                    | Homelessness, food insecurity, trouble paying utilities, trouble paying medications, transportation difficulties, child/elder care challenges, education needs | Paper screening tool, entered into EHR flowsheets                                       | At clinical encounters         | Yes                                                                                    |
| 179 | 32119804 | Initiating and Implementing Social Determinants of Health Data Collection in Community Health Centers                  | 8 safety net community health centers in 5 states across the United States                                                  | Electronic health record (EHR)-based screening questionnaire developed by OCHIN, Inc. network of community health centers | Financial resource strain, food insecurity, housing insecurity, relationship safety, inadequate physical activity, social connection/isolation, stress         | EHR-based screening questionnaire                                                       | During clinical encounters     | Yes                                                                                    |
| 195 | 34020026 | The Envirome Web Service: Patient Context at the Point of Care                                                         | Children's Mercy Hospital, Kansas City, MO                                                                                  | Envirome Web Service (EWS)                                                                                                | Census tract socioeconomic data (income, education, housing, age, race/ethnicity data), food access/food desert data                                           | Real-time geocoding of patient address, linking to publicly available census tract data | In real-time at point of care  | Yes - Integrated with Cerner electronic health record via web service                  |
| 214 | 33936457 | Social Determinant of Health Documentation Trends and Their Association with Emergency Department Admissions           | Not specified                                                                                                               | ICD-10 Z-codes                                                                                                            | Housing, economic circumstances, education, employment, family/social issues, legal issues                                                                     | ICD-10 Z-codes in administrative claims data                                            | At time of admission           | Yes - HCUP Nationwide Readmissions Database used which contains ICD-10 codes from EHRs |
| 216 | 25217095 | Moving Electronic Medical Records Upstream: Incorporating Social Determinants of Health                                | Case 1: Johns Hopkins Children's Center<br>Case 2: Utility shut-off protection<br>Case 3: Homelessness, housing instability | Case 1: Social history section in Epic EHR<br>Case 2: As needed<br>Case 3: At clinical encounters                         | Case 1: Food, transportation, child care, utilities                                                                                                            | Case 1: Screening questions in EHR                                                      | Case 1: At clinical encounters | Yes                                                                                    |
| 222 | 36292453 | Assessing Alignment of Patient and Clinician Perspectives on Community Health Resources for Chronic Disease Management | University of California, San Francisco                                                                                     | Qualitative interviews, neighborhood tours, clinic observations                                                           | Food, physical activity, transportation, community resources, pharmacy access, community cohesion                                                              | Semi-structured interviews, neighborhood walking tours, clinic visit observations       | One-time                       | Yes                                                                                    |
| 240 | 35862115 | The Adoption of Social Determinants of Health Documentation in Clinical Settings                                       | Washington University School of Medicine                                                                                    | Not specified                                                                                                             | Housing, food, transportation, employment, education, literacy                                                                                                 | ICD-10 Z-codes                                                                          | Not specified                  | Yes                                                                                    |
| 245 | 35570965 | Examining Social Determinants of Health During a Pandemic: Clinical Application of Z Codes before and During Covid-19  | Healthcare facilities in South Carolina                                                                                     | EHR database Z-code                                                                                                       | Z55-Z65 ICD-10 CM codes (education, employment, housing, family/social support, etc.)                                                                          | ICD-10 Z-codes                                                                          | Not specified                  | Yes                                                                                    |

|     |          |                                                                                                                                                               |                                                  |                                                                                                               |                                                                                                                                                                                                    |                                                                                                                   |                                                                                          |                                                                                                               |
|-----|----------|---------------------------------------------------------------------------------------------------------------------------------------------------------------|--------------------------------------------------|---------------------------------------------------------------------------------------------------------------|----------------------------------------------------------------------------------------------------------------------------------------------------------------------------------------------------|-------------------------------------------------------------------------------------------------------------------|------------------------------------------------------------------------------------------|---------------------------------------------------------------------------------------------------------------|
| 251 | 34874813 | What Do Ehrs Tell Us About How We Deploy Health Professionals to Address the Social Determinants of Health                                                    | University of North Carolina at Chapel Hill      | Electronic Medical Record Search Engine (EMERSE)                                                              | Food insecurity, housing insecurity                                                                                                                                                                | Searched unstructured EHR text notes using keyword bundles related to food and housing insecurity                 | One-time search                                                                          | Yes - The study analyzed unstructured EHR text notes                                                          |
| 276 | 36273141 | Do Patients Want Clinicians to Ask About Social Needs and Include This Information in Their Medical Record?                                                   | University of Pittsburgh                         | Accountable Care Communities (AHC) Health-Related Social Needs (HRSN) Screening Tool                          | Housing instability, food insecurity, transportation difficulties, utility assistance needs, interpersonal safety                                                                                  | Web-based survey or telephone interview using AHC HRSN Screening Tool                                             | One-time                                                                                 | No - The social needs data collected was not linked to patients' EHRs                                         |
| 280 | 36403352 | Discuss and Remember: Clinician Strategies for Integrating Social Determinants of Health in Patient Records and Care                                          | Urban teaching hospital in US Midwest            | Not applicable                                                                                                | Economic stability, neighborhood and physical environment, education, food, community and social context, healthcare system access                                                                 | Ethnographic observation, clinician and patient interviews, review of EHR text notes                              | One-time                                                                                 | Yes - The study analyzed how clinicians document and use SDOH data in EHRs                                    |
| 282 | 36301647 | Leveraging Social Determinants of Health to Reduce Hospital Length of Stay: A Pilot Qi Project for Solid Tumor Oncology Patients During the Covid-19 Pandemic | Medical College of Wisconsin, Froedtert Hospital | Validated SDOH screening survey                                                                               | Sociodemographic factors, behavioral factors, other risks (see Appendix in article)                                                                                                                | Inpatient SDOH survey integrated into electronic medical record                                                   | One-time survey completed within 24 hours of hospital admission, repeated every 6 months | Yes - The SDOH survey was integrated into the electronic medical record                                       |
| 288 | 23304335 | Social and Behavioral History Information in Public Health Datasets                                                                                           | Not applicable                                   | BRFSS, NHANES, NHIS                                                                                           | Alcohol use, drug use, occupation, tobacco use, and other social/behavioral factors                                                                                                                | Survey data from BRFSS, NHANES, and NHIS public health surveys                                                    | BRFSS - annual; NHANES - every 2 years; NHIS - annual                                    | No - The study analyzed survey data, not EHR data                                                             |
| 290 | 31199345 | Incorporating Social Determinants of Health in Electronic Health Records: Qualitative Study of Current Practices among Top Vendors                            | Not applicable                                   | Screening tools (e.g. PRAPARE), population health management tools, referral management tools, analytic tools | Various SDoH domains                                                                                                                                                                               | Structured data capture, free text                                                                                | One-time or periodic screening                                                           | Yes - The study examined how EHR vendors are enabling SDoH data capture and use                               |
| 293 | 31329894 | Psychosocial Information Use for Clinical Decisions in Diabetes Care                                                                                          | Multiple institutions                            | Not specified                                                                                                 | Financial strain, mental health status, life stressors, food security, health literacy, social support                                                                                             | Physician interviews and online survey                                                                            | One-time data collection                                                                 | Not specified                                                                                                 |
| 305 | 29854249 | Residence, Living Situation, and Living Conditions Information Documentation in Clinical Practice                                                             | University of Minnesota, Allina Health           | General Architecture for Text Engineering (GATE)                                                              | Residence, Living Situation, Living Conditions                                                                                                                                                     | Unstructured clinical notes                                                                                       | Not specified                                                                            | Yes                                                                                                           |
| 309 | 35788378 | New Data Resources, Linkages, and Infrastructure for Cancer Health Economics Research: Main Topics from a Panel Discussion                                    | National Cancer Institute                        | SEER-CMS, SEER-Medicare, SEER-Medicaid                                                                        | Area-level measures such as median household income, education level, racial/ethnic makeup of population. Plans to incorporate more area-level and individual-level social determinants of health. | Linking cancer registry data (SEER) to CMS administrative data (Medicare and Medicaid enrollment and claims data) | SEER data submitted yearly. SEER-CMS linkage done every other year.                      | Yes - investigating mechanisms to incorporate more social determinants of health measures into SEER-CMS data. |

|     |          |                                                                                                                                                                                             |                                     |                                    |                                                                                                                                                  |                                                                                                                                                                  |                                                                                                        |                                                                 |
|-----|----------|---------------------------------------------------------------------------------------------------------------------------------------------------------------------------------------------|-------------------------------------|------------------------------------|--------------------------------------------------------------------------------------------------------------------------------------------------|------------------------------------------------------------------------------------------------------------------------------------------------------------------|--------------------------------------------------------------------------------------------------------|-----------------------------------------------------------------|
| 315 | 35275090 | Linking Electronic Health Records and in-Depth Interviews to Inform Efforts to Integrate Social Determinants of Health into Health Care Delivery: Protocol for a Qualitative Research Study | Geisinger                           | N/A                                | Education, financial resource strain, stress, social isolation, transportation challenges, childhood trauma, housing instability                 | In-depth patient interviews; Extraction of discrete data (diagnoses, medications, utilization) and free text clinic notes from EHR                               | One-time in-depth interviews with patients. EHR data extracted from 1996-year of interview (2017-2021) | Yes – study links in-depth interview data with patient EHR data |
| 320 | 34406088 | Operationalizing the Population Health Framework: Clinical Characteristics, Social Context, and the Built Environment                                                                       | Christiana Care Health System       | N/A                                | Smoking status, residential address, demographic and clinical data                                                                               | Extraction from Epic EHR                                                                                                                                         | One-time extraction of 1 year of admissions data                                                       | Yes                                                             |
| 326 | 32701467 | Expanding Data Reporting Capacity of Free and Charitable Clinics: A Quality Improvement Project                                                                                             | University of Alabama at Birmingham | SDOH Data Reporting Toolkit        | Employment, housing, exposure to violence, food insecurity, utility needs, transportation, education level<br>CMS Quality Data Reporting Toolkit | Web-based technical assistance toolkit<br><br>Diabetic and hypertension control, tobacco screening, cancer and depression screening, obesity screening/follow-up | 16 weeks(the program length)<br><br>16 weeks                                                           | Yes                                                             |
|     |          |                                                                                                                                                                                             |                                     |                                    | EHR Implementation Toolkit<br>Economic stability, education, neighborhood and built environment, social and community context                    | Not Specified<br>Not Specified                                                                                                                                   | 16 weeks<br>16 weeks                                                                                   |                                                                 |
| 331 | 36111269 | Identifying Individual Social Risk Factors Using Unstructured Data in Electronic Health Records and Their Relationship with Adverse Clinical Outcomes                                       | University of Virginia, USA         | N/A                                |                                                                                                                                                  | Unstructured EHR data analysis                                                                                                                                   | During a 12-month period (July 2018 - June 2019)                                                       | Yes                                                             |
| 339 | 28679877 | Crowdhealth: Holistic Health Records and Big Data Analytics for Health Policy Making and Personalized Health                                                                                |                                     | CrowdHEALTH                        | Economic stability, education, neighborhood and built environment, social and community context                                                  |                                                                                                                                                                  | Continuous (real-time big data analytics)                                                              | Yes                                                             |
| 348 | 33735133 | Social and Behavioral Variables in the Electronic Health Record: A Path Forward to Increase Data Quality and Utility                                                                        | Johns Hopkins Health System         | N/A                                | Social and Behavioral Determinants of Health                                                                                                     | Structured and unstructured EHR data, focus groups, interviews                                                                                                   | Specific to the study conducted                                                                        | Yes                                                             |
| 359 | 32924796 | Feasibility of Mobile Technology to Identify and Address Patients' Unmet Social Needs in a Primary Care Clinic                                                                              | Wake Forest School of Medicine      | Tablet-based digital health system | Food security, housing, transportation                                                                                                           | Tablet-based questionnaire via electronic portal                                                                                                                 | At selected clinic sessions                                                                            | Yes                                                             |

|     |          |                                                                                                                         |                                                                                                                                                                  |                                                                                           |                                                                                                                          |                                                                                                                                    |                                                                                         |     |
|-----|----------|-------------------------------------------------------------------------------------------------------------------------|------------------------------------------------------------------------------------------------------------------------------------------------------------------|-------------------------------------------------------------------------------------------|--------------------------------------------------------------------------------------------------------------------------|------------------------------------------------------------------------------------------------------------------------------------|-----------------------------------------------------------------------------------------|-----|
| 360 | 32430381 | Integrating Community and Clinical Data to Assess Patient Risks with a Population Health Assessment Engine (Phate)      | University of Texas Health San Antonio                                                                                                                           | PHATE                                                                                     | Neighborhood SDH data, Clinical data from EHRs                                                                           | Integration of neighborhood and clinical data in EHR                                                                               | Not specified                                                                           | Yes |
| 361 | 33119102 | Comparison of Community-Level and Patient-Level Social Risk Data in a Network of Community Health Centers               | OCHIN Network of Community Health Centers                                                                                                                        | Not specified                                                                             | Food insecurity, housing insecurity, financial resource strain                                                           | Patient-level social risk screening and community-level data from American Community Survey                                        | Not specified                                                                           | Yes |
| 362 | 34666982 | Routinely Asking Patients About Income in Primary Care: A Mixed-Methods Study                                           | St Michael's Family Health Team, Toronto, Canada                                                                                                                 | Not specified                                                                             | Income                                                                                                                   | Sociodemographic survey including questions about income                                                                           | Routinely administered                                                                  | Yes |
| 364 | 21836738 | Incorporating Geospatial Capacity within Clinical Data Systems to Address Social Determinants of Health                 | Indiana University-Purdue University Indianapolis, School of Liberal Arts, The Polis Center, Indiana University, School of Medicine, Regenstrief Institute, Inc. | Indiana Network for Patient Care (INPC), SAVI Community Information System (SAVI)         | Geospatial location of patients, community-level characteristics (e.g., SES, crime incidence, health facility locations) | Integration of EHR data with CIS data, including geocoding and linking with community datasets                                     | Ongoing as part of routine healthcare provision and CIS updates                         | Yes |
| 369 | 29930967 | Integrating Social Determinants of Health into Primary Care Clinical and Informational Workflow During Care Transitions | University at Buffalo, Elmwood Health Center, University of Minnesota, among others                                                                              | Coordinating Transitions (CT) Project                                                     | Social support networks, home and neighborhood environment, health literacy and well-being, economic forces              | Use of electronic health records, care transition alerts, social determinants of health (SDH) assessments, data from Medicaid Data | Real-time alerts for recent hospital discharges, ongoing assessment and data collection | Yes |
| 388 | 32734157 | A Case Study of the 1115 Waiver Using Population Health Informatics to Address Disparities                              |                                                                                                                                                                  | University of California San Diego Health and others, 1115 Medicaid Waiver, PRIME program | Race, Ethnicity, Language, Sexual Orientation, Gender Identity                                                           | Electronic Health Records, Patient Portal, Clinical Decision Support Tools                                                         | Ongoing data collection and analysis, regular updates                                   | Yes |
| 394 | 27170802 | Community Vital Signs: Taking the Pulse of the Community While Caring for Patients                                      | Various institutions including University of California San Diego Health                                                                                         | Community Vital Signs                                                                     | Socioeconomic and health behavior data, neighborhood factors (poverty level, education, employment status, etc.)         | Linkage of aggregated population health data with patient addresses in EHRs, Geocoding technologies                                | Data is aggregated and updated continuously                                             | Yes |

|     |          |                                                                                                                                                                                        |                                                                                                                                  |                                                                                           |                                                                                                                                                              |                                                                                                                                      |                                                                   |                                                                       |
|-----|----------|----------------------------------------------------------------------------------------------------------------------------------------------------------------------------------------|----------------------------------------------------------------------------------------------------------------------------------|-------------------------------------------------------------------------------------------|--------------------------------------------------------------------------------------------------------------------------------------------------------------|--------------------------------------------------------------------------------------------------------------------------------------|-------------------------------------------------------------------|-----------------------------------------------------------------------|
| 395 | 36696168 | Recording of Social Determinants in Computerized Medical Records in Primary Care Consultations: Quasi-Experimental Study                                                               | Institut Català de la Salut, Central Catalonia Territorial Management, Spain                                                     | e-cap program, ICD-11 Z-coding                                                            | Unemployment, Stressful work schedule, Problems related to living alone, Difficulty in acculturation, Specific problems related to the immediate environment | Coding of social determinants in computerized medical records through ICD-11 Z-coding; Checklist integrated in primary care workflow | Ongoing, with initial 6-month intervention period for the study   | Yes, integrated with the e-cap program in primary care settings       |
| 396 | 28103072 | Community Health Records: Establishing a Systematic Approach to Improving Social and Physical Determinants of Health                                                                   | Not Specified                                                                                                                    | Community Health Records (CHR)                                                            | Broad range of community health metrics including social, physical, and lifestyle determinants                                                               | Digital forms, linking/mapping external datasets (not specified)                                                                     | Not Specified                                                     | Yes                                                                   |
| 397 | 22511197 | Identifying Social Risk Via a Clinical Social History Embedded in the Electronic Health Record                                                                                         | Cincinnati Children's Hospital Medical Center                                                                                    | EHR-embedded Social History Template                                                      | Financial stability, food scarcity, public benefits, housing conditions, personal safety, parental depression                                                | EHR-embedded template                                                                                                                | Not specified                                                     | Yes                                                                   |
| 405 | 29888079 | Evaluation of Flowsheet Documentation in the Electronic Health Record for Residence, Living Situation, and Living Conditions                                                           | University of Minnesota, Minneapolis, MN; University of Kansas Medical Center, Kansas City, KS; Brown University, Providence, RI | Flowsheet in EHR                                                                          | Residence, Living Situation, Living Conditions                                                                                                               | Flowsheet data in EHR, including structured and unstructured data                                                                    | Data from inpatients in 2013                                      | Yes                                                                   |
| 417 | 26174867 | Community Vital Signs: Incorporating Geocoded Social Determinants into Electronic Records to Promote Patient and Population Health                                                     | Oregon Health & Science University; American Medical Association                                                                 | Community Vital Signs (Community VS)                                                      | Social, economic, occupational, environmental factors                                                                                                        | Geocoded community-level data from publicly available sources, integrated into EHRs                                                  | Not specified                                                     | Yes                                                                   |
| 420 | 29190680 | Identifying Social Factors Amongst Older Individuals in Linked Electronic Health Records: An Assessment in a Population Based Study                                                    | CRPD data                                                                                                                        | Clinical Practice Research Datalink (CPRD) linked to hospitalisation and deprivation data | Religion, ethnicity, immigration status, small area-level deprivation, place of residence, marital status, living arrangements                               | Primary care data from CPRD linked to hospitalisation and deprivation data in a cross-sectional study                                | Not specified in the extract                                      | Yes                                                                   |
| 432 | 34842542 | Developing the Total Health Profile, a Generalizable Unified Set of Multimorbidity Risk Scores Derived from Machine Learning for Broad Patient Populations: Retrospective Cohort Study | Not specified                                                                                                                    | Total Health Profile (THP)                                                                | Socio-demographic data (age, gender, income, race, ethnicity, etc.), Diagnosis codes, Lab results, Prescriptions, Medical procedural data                    | Electronic Health Records (EHR)                                                                                                      | Retrospective analysis from January 1, 2016, to December 31, 2019 | Yes, heavily reliant on EHR data for model development and validation |

|     |          |                                                                                                                                                                 |                                                                               |                                                                                                                     |                                                                                                                                                                             |                                                                                                                                                                                                                                                       |                                                                                                              |     |
|-----|----------|-----------------------------------------------------------------------------------------------------------------------------------------------------------------|-------------------------------------------------------------------------------|---------------------------------------------------------------------------------------------------------------------|-----------------------------------------------------------------------------------------------------------------------------------------------------------------------------|-------------------------------------------------------------------------------------------------------------------------------------------------------------------------------------------------------------------------------------------------------|--------------------------------------------------------------------------------------------------------------|-----|
| 434 | 31285969 | Adding Social Determinants in the Electronic Health Record in Clinical Care in Hawai'i: Supporting Community-Clinical Linkages in Patient Care                  | Kaiser Permanente Hawai'i; Hawai'i Pacific Health; The Queen's Health Systems | SWITCH program; SBD measures in EHR; CMS Accountable Health Communities' Health-Related Social Needs Screening Tool | Social challenges, interpersonal needs, social support, inpatient mobility, housing instability, food insecurity, transportation needs, utility needs, interpersonal safety | EHR integration, social needs screening tools, data fields in EHR, AI-based prediction tools                                                                                                                                                          | Not explicitly mentioned                                                                                     | Yes |
| 441 | 35917481 | Issues with Variability in Electronic Health Record Data About Race and Ethnicity: Descriptive Analysis of the National Covid Cohort Collaborative Data Enclave | National COVID Cohort Collaborative (N3C)                                     | N3C Data Enclave                                                                                                    | Race and Ethnicity                                                                                                                                                          | Electronic Health Records, Standardized Mapping and Harmonization                                                                                                                                                                                     | Updated Weekly                                                                                               | Yes |
| 448 | 33190565 | Required Data Elements for Interprofessional Rounds through the Lens of Multiple Professions                                                                    | Academic 465-bed tertiary care hospital in a large urban Midwestern city, USA | Interprofessional Rounding Tool                                                                                     | Discharge-related, social determinants of health, hospital safety, nutrition, interprofessional situation awareness, patient history                                        | Semi-structured interviews, Cognitive Task Analysis                                                                                                                                                                                                   | Not specified                                                                                                | Yes |
| 462 | 32577152 | The Population Health Outcomes and Information Exchange (Phoenix) Program - a Transformative Approach to Reduce the Burden of Chronic Disease                   | Wayne State University, Detroit Health Department                             | PHOENIX Program                                                                                                     | Clinical and social determinants of health data                                                                                                                             | Electronic Health Records, State of Michigan Vital Statistics, US Census/American Communities Survey, Uniform Crime Reports, WSU Investigator Databases, National Center for Education Statistics, Patient/Resident Generated Health Data, and others | Continuously updated, specific frequency not mentioned                                                       | Yes |
| 467 | 37099562 | Target-Based Fusion Using Social Determinants of Health to Enhance Suicide Prediction with Electronic Health Records                                            | University of Connecticut; Weill Cornell Medicine; UConn Health               | Data Fusion Framework using Add Health Data                                                                         | Social determinants of health (e.g., social support, parental relationship quality, peer interactions, perceptions of town safety, etc.)                                    | Fusion of EHR data from Connecticut's Hospital Inpatient Discharge Database and survey data from The National Longitudinal Study of Adolescent to Adult Health (Add Health)                                                                           | Retrospective study (Data collected from 2012 to 2017 for the HIDD and baseline wave in 1994 for Add Health) | Yes |



|     |          |                                                                                                                                                           |                                                                                                                                                |                                                            |                                                                                                                                                                                  |                                                                                                          |                                                              |     |
|-----|----------|-----------------------------------------------------------------------------------------------------------------------------------------------------------|------------------------------------------------------------------------------------------------------------------------------------------------|------------------------------------------------------------|----------------------------------------------------------------------------------------------------------------------------------------------------------------------------------|----------------------------------------------------------------------------------------------------------|--------------------------------------------------------------|-----|
| 471 | 35758723 | Addressing Social Needs in the Clinical Setting: Description of Needs Identified in a Quality Improvement Pilot across 3 Community Hospital Service Areas | Advocate Aurora Health                                                                                                                         | NowPow, a Unite Us Company Platform                        | Financial stability, food and nutrition, transportation, housing, employment                                                                                                     | Digital platform for screening and referral to community resources, integrated with EHR                  | Data collected from November 2018 to November 2020           | Yes |
| 473 | 30715327 | Incorporating a Location-Based Socioeconomic Index into a De-Identified I2b2 Clinical Data Warehouse                                                      | University of Nebraska Medical Center                                                                                                          | Informatics for Integrating Biology and the Bedside (i2b2) | Socioeconomic variables from the American Community Survey (ACS) including education, employment, poverty, public assistance, family structure, income                           | Integration of EHR data with ACS data, geocoding patient data                                            | Data extracted from the EHR and ACS for the period 2011-2015 | Yes |
| 478 | 29029685 | Using Structured and Unstructured Data to Identify Patients' Need for Services That Address the Social Determinants of Health                             | Indiana University Richard M. Fairbanks School of Public Health, Regenstrief Institute, Indiana University School of Medicine, Eskenazi Health | Not specified                                              | Social work, behavioral health, nutrition counseling, respiratory therapy, financial planning, medical-legal partnership assistance, patient navigation, pharmacist consultation | Structured billing and scheduling data, and unstructured EHR data                                        | Cross-sectional study period from April 2012 to July 2016    | Yes |
| 480 | 25092009 | Envisioning a Social-Health Information Exchange as a Platform to Support a Patient-Centered Medical Neighborhood: A Feasibility Study                    | University of Texas Southwestern Medical Center, Parkland Center for Clinical Innovation                                                       | Social-Health Information Exchange (S-HIE)                 | Homelessness, poverty, food insecurity, social isolation, etc.                                                                                                                   | Web-based IT infrastructure, interviews, and town hall meetings                                          | Study period from October 2010 to May 2011                   | Yes |
| 482 | 37051408 | Evaluating Demographic Data to Improve Confidence in Equity Analytics in a Children's Hospital                                                            | Akron Children's Hospital                                                                                                                      | Epic Systems (EHR)                                         | Race, Sex, Ethnicity, Language, Zip Code, Payer, Age                                                                                                                             | Electronic Health Record (EHR), Training for REaL (Race, Ethnicity, and Language) Data Collection        | Not Specified                                                | Yes |
| 500 | 36973053 | Patient-Reported Social Risks and Clinician Decision Making: Results of a Clinician Survey in Primary Care Community Health Centers                       | OCHIN Inc, University of California San Francisco, Kaiser Center for Health Research                                                           | EHR-embedded card study                                    | Not specified in the extract                                                                                                                                                     | Embedded EHR surveys                                                                                     | During a 3-week period (daily prompts for clinicians)        | Yes |
| 508 | 27834242 | Communityrx: A Population Health Improvement Innovation That Connects Clinics to Communities                                                              | University of Chicago, Community Health Centers                                                                                                | CommunityRx                                                | 37 prevalent social and medical conditions                                                                                                                                       | E-prescribing model with community engagement, youth workforce, community health information specialists | Not specified in the extract                                 | Yes |

|     |          |                                                                                                                                                                                               |                                                                                                                                                               |                                                                                             |                                                                                                                        |                                                                                        |                                                                                                                                              |     |
|-----|----------|-----------------------------------------------------------------------------------------------------------------------------------------------------------------------------------------------|---------------------------------------------------------------------------------------------------------------------------------------------------------------|---------------------------------------------------------------------------------------------|------------------------------------------------------------------------------------------------------------------------|----------------------------------------------------------------------------------------|----------------------------------------------------------------------------------------------------------------------------------------------|-----|
| 514 | 26969124 | Utility of Linking Primary Care Electronic Medical Records with Canadian Census Data to Study the Determinants of Chronic Disease: An Example Based on Socioeconomic Status and Obesity       | Queen's University-Canada                                                                                                                                     | CPCSSN                                                                                      | Socio-economic status, BMI, Obesity, Area-level deprivation                                                            | EMR Data, Census Data                                                                  | January 1st to December 31st, 2011 (One-time extraction)                                                                                     | Yes |
| 519 | 22511015 | Harmonized Patient-Reported Data Elements in the Electronic Health Record: Supporting Meaningful Use by Primary Care Action on Health Behaviors and Key Psychosocial Factors                  | Multiple Institutions including Virginia Tech, National Institutes of Health, Harvard University, National Cancer Institute, Virginia Commonwealth University | EHR Harmonized Patient-Reported Data Elements                                               | Health behaviors (e.g., exercise), psychosocial issues (e.g., distress), patient-centered factors (e.g., demographics) | Electronic Health Records (EHR), Surveys                                               | Frequency varies: single assessment (e.g., demographics), annual assessment (e.g., health behaviors), or more frequent (e.g., patient goals) | Yes |
| 527 | 30691480 | Study Protocol: A Pragmatic, Stepped-Wedge Trial of Tailored Support for Implementing Social Determinants of Health Documentation/Action in Community Health Centers, with Realist Evaluation | Kaiser Permanente-Center for Health Research, OCHIN, Inc                                                                                                      | OCHIN: EHR-based Social Determinants of Health Documentation                                | Various social determinants of health (e.g., chronic stress, poverty, lack of access to healthy foods/safe exercise)   | Electronic Health Records (EHR), Patient Portals, Tablets at Clinic, Paper-based Entry | Ongoing, as part of routine care                                                                                                             | Yes |
| 529 | 28269967 | Representing Residence, Living Situation, and Living Conditions: An Evaluation of Terminologies, Standards, Guidelines, and Measures/Surveys                                                  | Institute for Health Informatics, University of Minnesota; Allina Health, Minneapolis, MN; Center for Biomedical Informatics, Brown University                | Various (including SNOMED-CT, US Census, HL7, openEHR, etc.)                                | Residence, Living Situation, Living Conditions                                                                         | Electronic Health Records (EHR), Surveys, Standards, and Guidelines                    | Variable (based on source standards and guidelines)                                                                                          | Yes |
| 531 | 34803048 | The Direct Clinic-Level Cost of the Implementation and Use of a Protocol to Assess and Address Social Needs in Diverse Community Health Center Primary Care Clinical Settings                 | Duke University School of Medicine; University of North Carolina at Chapel Hill; Lincoln Community Health Center; Durham VA Healthcare System                 | PRAPARE (Protocol for Responding to and Assessing Patients' Assets, Risks, and Experiences) | Food insecurity, housing instability, social isolation, unemployment, and other social determinants                    | Interviews, Activity-Based Costing Tool                                                | Ongoing maintenance after initial implementation                                                                                             | Yes |

|     |          |                                                                                                                                                                                                                                                            |                                                                                                              |                                                |                                                                                                                                                    |                                                                                                                                                    |                                                                                             |     |
|-----|----------|------------------------------------------------------------------------------------------------------------------------------------------------------------------------------------------------------------------------------------------------------------|--------------------------------------------------------------------------------------------------------------|------------------------------------------------|----------------------------------------------------------------------------------------------------------------------------------------------------|----------------------------------------------------------------------------------------------------------------------------------------------------|---------------------------------------------------------------------------------------------|-----|
| 536 | 34623308 | Using Electronic Health Record-Based Clinical Decision Support to Provide Social Risk-Informed Care in Community Health Centers: Protocol for the Design and Assessment of a Clinical Decision Support Tool                                                | OCHIN member CHCs                                                                                            | EHR-based CDS tools                            | Various social risks (e.g., food, housing, transportation insecurity)                                                                              | EHR tools, patient-reported data                                                                                                                   | Not specified                                                                               | Yes |
| 539 | 30354371 | Compass-Cp: An Electronic Application to Capture Patient-Reported Outcomes to Develop Actionable Stroke and Transient Ischemic Attack Care Plans                                                                                                           | Wake Forest University Health Sciences, 20 North Carolina hospitals                                          | COMPASS-CP                                     | Physical, mental, and social well-being; medication adherence; financial challenges; caregiver health and needs                                    | Web-based application, iPad application                                                                                                            | At 2-day post-discharge and 7-14 day clinic visit                                           | Yes |
| 559 | 36375772 | Methods for Development and Application of Data Standards in an Ontology-Driven Information Model for Measuring, Managing, and Computing Social Determinants of Health for Individuals, Households, and Communities Evaluated through an Example of Asthma | Department of Population Health, Dell Medical School, University of Texas at Austin                          | Asthma CDS tools                               | Environmental factors important for managing pediatric asthma, including local outdoor air quality monitors, indoor air quality questionnaire data | Questionnaire, Local outdoor air quality monitors, EHR data                                                                                        | Not specified in the excerpt                                                                | Yes |
| 560 | 30202181 | The Community and Patient Partnered Research Network (Cpnr): Application of Patient-Centered Outcomes Research to Promote Behavioral Health Equity                                                                                                         | Community effort                                                                                             | CPPRN                                          | Behavioral health and social risk factors                                                                                                          | Community partnered participatory research (CPPR), large, de-identified dataset across county agencies, information technology-supported screening | Not specified                                                                               | Yes |
| 575 | 31083298 | The Association of Black Cardiologists (Abc) Cardiovascular Implementation Study (Cvis): A Research Registry Integrating Social Determinants to Support Care for Underserved Patients                                                                      | Morehouse School of Medicine, Duke University School of Medicine, Association of Black Cardiologists, Others | ABC Cardiovascular Implementation Study (CVIS) | Socio-demographic data, clinical and biospecimen data, social determinants of health                                                               | Prospective cohort registry; electronic data capture, mobile health technology, and APIs to health system or practice EHRs                         | Ongoing, regular data collection as standard of care dictates; approximately every 6 months | Yes |
| 593 | 22937207 | The Murdock Study: A Long-Term Initiative for Disease Reclassification through Advanced Biomarker Discovery and Integration with Electronic Health Records                                                                                                 | Duke Translational Medicine Institute                                                                        | MURDOCK Study                                  | Not explicitly mentioned                                                                                                                           | Biospecimens, EHR data, environmental and social data                                                                                              | Annually (for registry updates)                                                             | Yes |

|     |          |                                                                                                                                                            |                                                                                                            |                                                                                                                     |                                                                                                                                                     |                                                                                                                                                                                                             |                                          |      |
|-----|----------|------------------------------------------------------------------------------------------------------------------------------------------------------------|------------------------------------------------------------------------------------------------------------|---------------------------------------------------------------------------------------------------------------------|-----------------------------------------------------------------------------------------------------------------------------------------------------|-------------------------------------------------------------------------------------------------------------------------------------------------------------------------------------------------------------|------------------------------------------|------|
| 600 | 1458861  | The Chronic Disease Data Bank Model: A Conceptual Framework for the Computer-Based Medical Record                                                          | Not explicitly stated                                                                                      | ARAMIS, ATHOS                                                                                                       | Chronic diseases (e.g., rheumatic diseases, cardiovascular disease, pulmonary disease, renal disease, neurological disease, HIV-associated disease) | Time-oriented data, longitudinal data collection, Health Assessment Questionnaire (HAQ)                                                                                                                     | Every 6 months (as indicated for ARAMIS) | Yes  |
| 605 | 37008604 | Insights into Measuring Health Disparities Using Electronic Health Records from a Statewide Network of Health Systems: A Case Study                        | University of Wisconsin School of Medicine and Public Health, Madison, WI, USA                             | Wisconsin Collaborative for Healthcare Quality (WCHQ) data repository                                               | Health disparities (race and ethnicity, insurance status and type, geographic disparity)                                                            | EHR data collection, common data model, structured patient-level data (demographics, encounters, hospitalizations, medications, laboratory values, clinical values, smoking history, providers and clinics) | Not explicitly stated                    | OMOP |
| 626 | 36711509 | Social Determinants of Health: A Need for Evidence-Based Guidelines on How to Capture Data on Underserved Patients                                         | Mayo Clinic                                                                                                | Not specified                                                                                                       | Housing instability, lack of transportation, financial concerns, social isolation                                                                   | Electronic medical record data collection, patient questionnaire                                                                                                                                            | Annually (as part of clinical care)      | Yes  |
| 629 | 35939597 | A Need for Digitally Inclusive Health Care Service in the United States: Recommendations for Clinicians and Health Care Systems                            | Mayo Clinic Health System–Northwest Wisconsin Region, Eau Claire, WI, USA; Mayo Clinic, Rochester, MN, USA | Not specified                                                                                                       | Digital access (broadband internet connectivity and access to smart devices), digital health literacy                                               | Electronic health record screening for digital access and literacy                                                                                                                                          | At primary visit and subsequent visits   | Yes  |
| 644 | 31659920 | An Evidence-Based Strategy to Achieve Equivalency and Interoperability for Social-Behavioral Determinants of Health Assessment, Storage, Exchange, and Use | Cerner Corporation, USA; University of Kansas, USA                                                         | PRAPARE (Protocol for Responding to and Assessing Patients' Assets, Risks, and Experiences) tool and IOM instrument | Various social-behavioral determinants of health                                                                                                    | Three-tier scoring strategy for data equivalence                                                                                                                                                            | Not specified                            | Yes  |
| 692 | 35658093 | Covid-19 Variant Surveillance and Social Determinants in Central Massachusetts: Development Study                                                          | Medical School, Worcester, MA, United States                                                               | University of Massachusetts' Graphical user interface for Geographic Information (MAGGI)                            | Race, ethnicity, median family income, housing, language, poverty, population density, social vulnerability index                                   | Integrated data from electronic medical records, SARS-CoV-2 genomic analysis, and public health resources                                                                                                   | Monthly                                  | Yes  |

|     |          |                                                                                                                                                                                  |                                                                |                                        |                                                                                                                                                                                                                                                                                                                                       |                                                                                                                                                                                              |                                                                        |     |
|-----|----------|----------------------------------------------------------------------------------------------------------------------------------------------------------------------------------|----------------------------------------------------------------|----------------------------------------|---------------------------------------------------------------------------------------------------------------------------------------------------------------------------------------------------------------------------------------------------------------------------------------------------------------------------------------|----------------------------------------------------------------------------------------------------------------------------------------------------------------------------------------------|------------------------------------------------------------------------|-----|
| 693 | 34867537 | The Biopsychosocial Model and Perinatal Health Care: Determinants of Perinatal Care in a Community Sample                                                                        | University of Rochester, Rochester, NY, United States          | Kotelchuck Index (KI)                  | Socio-demographic (race, ethnicity, income, education, marital status), psychological (affective symptoms, trauma experience), social and family context (social support, family size)                                                                                                                                                | Self-report questionnaire, interview, abstracted from electronic medical records                                                                                                             | At each trimester visit                                                | Yes |
| 727 | 35186824 | Thrive Conceptual Framework and Study Protocol: A Community-Partnered Longitudinal Multi-Cohort Study to Promote Child and Youth Thriving, Health Equity, and Community Strength | University of Pittsburgh, PA, United States                    | Various (including PROMIS, NSCH, YRBS) | Demographics, family relationships, safety, vibrant communities, healthy environments, racial justice, equity and inclusion, overall health, physical activity, eating/nutrition, height and weight, sleep, screen time, health behaviors, alcohol, tobacco, and drug use, sexual activity, child mental health, academic performance | Analysis of electronic health records, school records, health and human services use, and other administrative secondary data combined with parent/caregiver and youth-reported survey data. | Longitudinal, spanning from pregnancy through adolescence              | Yes |
| 733 | 32811587 | Stability of Food Insecurity Status in Paediatric Primary Care                                                                                                                   | St. Christopher's Hospital for Children, Philadelphia, PA, USA | Hunger Vital Sign screener             | Food insecurity                                                                                                                                                                                                                                                                                                                       | Electronic health records                                                                                                                                                                    | Screened at intervals of 0-6 months, 6-12 months, and more than a year | Yes |

|     |          |                                                                                                                                                                                                                                                        |                                                                                                                                                                                                                      |                                                                 |                               |                                                                                      |                                                                                                    |                                                       |                                                                                                                           |            |                 |
|-----|----------|--------------------------------------------------------------------------------------------------------------------------------------------------------------------------------------------------------------------------------------------------------|----------------------------------------------------------------------------------------------------------------------------------------------------------------------------------------------------------------------|-----------------------------------------------------------------|-------------------------------|--------------------------------------------------------------------------------------|----------------------------------------------------------------------------------------------------|-------------------------------------------------------|---------------------------------------------------------------------------------------------------------------------------|------------|-----------------|
| 634 | 33209839 | Comparing the Performance of Two Social Risk Screening Tools in a Vulnerable Subpopulation                                                                                                                                                             | Social risks, behavioral health, stigma, functioning, self-rated health, concerns about healthcare costs, trust in healthcare providers                                                                              | 48 questions (social risk screening: AHC, YCLS)                 | Home-grown                    | KPSC members                                                                         | Telephone screening                                                                                | Active and Passive                                    | Personal and structural                                                                                                   | both       |                 |
| 637 | 33425666 | Quantitative and Qualitative Results from Implementation of a Two-Item Food Insecurity Screening Tool in Healthcare Settings in Connecticut                                                                                                            | Food                                                                                                                                                                                                                 | 2 screening questions                                           | Home-grown                    | Patients who presented for any type of visit                                         | A federally qualified health center (CSHHC)                                                        | Active                                                | Personal                                                                                                                  | personal   |                 |
| 695 | 32974614 | Protocol for Comparing Two Training Approaches for Primary Care Professionals Implementing the Safe Environment for Every Kid (Seek) Model                                                                                                             | Parental depression and major stress, substance abuse, IPV, harsh discipline, and food insecurity                                                                                                                    | SEEKonline (SEEK Parent Questionnaire-R )                       | Not specified                 | Children's parent                                                                    | Primary care settings, with a focus on pediatric and family medicine practices                     | Active                                                | Personal                                                                                                                  | personal   |                 |
| 778 | 34930500 | Using a Participatory Method to Test a Strategy Supporting the Implementation of a State Policy on Screening Children for Adverse Childhood Experiences (Aces) in a Federally Qualified Health Center System: A Stepped-Wedge Cluster Randomized Trial | Not specific                                                                                                                                                                                                         | PSC                                                             | Home-grown                    | Caregivers of children aged 0-5 years in the FQHC system                             | Child primary care visits (5 clinics)                                                              | Active and Passive                                    | Personal                                                                                                                  | personal   |                 |
| 368 | 34930500 | Part I: A Quantitative Study of Social Risk Screening Acceptability in Patients and Caregivers                                                                                                                                                         | Social risks (housing stability, food security, transportation, utilities, personal safety)                                                                                                                          | Center for Medicare and Medicaid Innovation Accountable Health  | Home-grown                    | Adult patients and caregivers of pediatric patients                                  | Primary care clinics and emergency departments across 9 states                                     | Active                                                | personal and structural                                                                                                   | both       | Added from Cat2 |
| 656 | 35978539 | Implementing Health Related Social Needs Screening in an Outpatient Clinic                                                                                                                                                                             | Housing quality and security, financial need, food insecurity, health literacy, immigration needs, transportation, utilities, domestic violence, social isolation                                                    | HRSN Screening Tool                                             | Home-grown                    | Patients of a FQHC, including those with chronic diseases and frequent clinic visits | Outpatient clinic setting within a FQHC                                                            | Active                                                | Both personal (health literacy, immigration needs) and structural determinants (housing quality, food                     | both       |                 |
| 148 | 35308947 | Extracting Patient-Level Social Determinants of Health into the Omop Common Data Model                                                                                                                                                                 | Housing Insecurity/Instability/Homelessness, Food insecurity, Employment, Education, Health Care/Medicine Access & Affordability, Immigration/Migrant Status/Refugee Status, Household size, Annual Household Income | Not specified in the abstract( OMOP -SDoH extraction flowsheet) | Home-grown                    | Patients tested for COVID-19 within UW Medicine Health Network                       | Health Network Enterprise Data Warehouse (EDW), including various hospitals and outpatient clinics | Active (via Epic Clarity FlowSheet structure)         | Personal                                                                                                                  | personal   |                 |
| 465 | 27170792 | Building a Foundation to Reduce Health Inequities: Routine Collection of Sociodemographic Data in Primary Care                                                                                                                                         | Sociodemographic Data (14 questions covering social determinants of health)                                                                                                                                          | Not specified                                                   | Home-grown                    | Adult patients in primary care                                                       | Family medicine clinic, St. Michael's Hospital, Toronto                                            | Active (self-administered using an electronic tablet) | Both Personal and Structural                                                                                              | both       |                 |
| 512 | 31376277 | Assessing the Availability of Data on Social and Behavioral Determinants in Structured and Unstructured Electronic Health Records: A Retrospective Analysis of a Multilevel Health Care System                                                         | Patient address/zip code, Ethnicity, Race, Preferred language, Alcohol use, Smoking status, Social connection/isolation, Housing issues, Income/financial resource strain                                            | N/A (Study-based Analysis)                                      | Home-grown                    | Patients within a multilevel academic health care system                             | Various clinical settings (e.g., inpatient and outpatient)                                         | Passive (Analysis of EHR data)                        | Both personal (e.g., alcohol use, smoking status) and structural (e.g., housing issues, income/financial resource strain) | both       |                 |
| 516 | 36036781 | Implementing a Process for Screening Hospitalized Adults for Food Insecurity at a Tertiary Care Center                                                                                                                                                 | Economic Stability                                                                                                                                                                                                   | USDA's HFSS-based 2-item Screen                                 | Vendor-specific (Epic System) | Hospitalized Adults                                                                  | 26-bed Adult Hospital Medicine Unit                                                                | Active                                                | Personal                                                                                                                  | personal   |                 |
| 646 | 36161115 | Addressing Social Risk Factors in the Inpatient Setting: Initial Findings from a Screening and Referral Pilot at an Urban Safety-Net Academic Medical Center in Virginia, USA                                                                          | Economic Stability, Housing Stability, Transportation                                                                                                                                                                | Health Leads (based on )                                        | Home-grown                    | Hospitalized Patients                                                                | Internal Medicine Unit at VCU Health                                                               | Active                                                | Structural                                                                                                                | structural |                 |
| 656 | 35978539 | Implementing Health Related Social Needs Screening in an Outpatient Clinic                                                                                                                                                                             | Housing, Financial, Food Insecurity, Health Literacy, Immigration, Transportation, Utilities, Domestic Violence, Social Isolation                                                                                    | HRSN Screening Tool                                             | Home-grown                    | FQHC Patients                                                                        | Outpatient Clinics of a FQHC                                                                       | Active                                                | Structural                                                                                                                | structural |                 |

| EndNote_ID | PubMed_ID | Title                                                                                                                                                     | Approach                                                                                     | features                                                                      | Accuracy(performance)                                                                                                                                                                                                                                                                    | Incorporate with EHR | NLP Tool/System              | Data Source 1                                                      | Data Source 2 | Data Source 3 |
|------------|-----------|-----------------------------------------------------------------------------------------------------------------------------------------------------------|----------------------------------------------------------------------------------------------|-------------------------------------------------------------------------------|------------------------------------------------------------------------------------------------------------------------------------------------------------------------------------------------------------------------------------------------------------------------------------------|----------------------|------------------------------|--------------------------------------------------------------------|---------------|---------------|
| 203        | 32131117  | Detecting Social and Behavioral Determinants of Health with Structured and Free-Text Clinical Data                                                        | Combination of machine learning and NLP techniques                                           | Bag-of-words, TF-IDF weights, structured EHR data                             | Variable; e.g., LGBT status F1 = 82.7, IV drug use F1 = 28.5                                                                                                                                                                                                                             | Yes                  | Not specified                | Columbia University Medical Center                                 |               |               |
| 440        | 30815082  | Towards the Inference of Social and Behavioral Determinants of Sexual Health: Development of a Gold-Standard Corpus with Semi-Supervised Learning         | Machine learning                                                                             | tf-idf weights, lexical features, ontological features from UMLS              | Poor performance on individual SBDH labels                                                                                                                                                                                                                                               | Yes                  | In-house NER system          | Columbia University Medical Center                                 |               |               |
| 201        | 35042703  | Simplified Data Science Approach to Extract Social and Behavioural Determinants: A Retrospective Chart Review                                             | Machine learning - Naive Bayes, SVM, logistic regression, random forest                      | Bag-of-words, n-grams, custom regex for negatives                             | Housing: 92.18%, Tobacco: 84.68%, Alcohol: 82.79%                                                                                                                                                                                                                                        | Yes                  | Not specified                | Harborview Medical Center                                          |               |               |
| 176        | 35005628  | Mimic-Sbdh: A Dataset for Social and Behavioral Determinants of Health                                                                                    | Machine Learning (Random Forest, XGBoost, Bio-ClinicalBERT)                                  | Classification of EHR notes for 7 SBDHs, marking of SBDH-related keywords     | F1 score range from 0.69 (Drug Use) to 0.96 (Community-Present)                                                                                                                                                                                                                          | No                   | Not specified                | MIMIC Dataset                                                      |               |               |
| 704        | 36652267  | Evaluation of a Model to Target High-Risk Psychiatric Inpatients for an Intensive Postdischarge Suicide Prevention Intervention                           | Machine learning (Super Learner ensemble)                                                    | NLP extracted terms/topics, geocoded data, EHR data                           | AUROC 0.747-0.780, net benefit at multiple thresholds                                                                                                                                                                                                                                    | Yes                  | Custom NLP methods           | VA EHR and databases                                               |               |               |
| 227        | 29084046  | Using Clinical Notes and Natural Language Processing for Automated Hiv Risk Assessment                                                                    | Machine learning (supervised, Random Forest, NLP techniques including TF-IDF and LDA)        | Random Forest, NLP techniques including TF-IDF and LDA                        | F-measures: 0.59 for baseline model, 0.63 for baseline + NLP topic model, 0.74 for baseline + NLP keyword model                                                                                                                                                                          | Yes                  | Not specified                | New York Presbyterian Hospital, Columbia University Medical Center |               |               |
| 312        | 34984989  | Evaluation of a Natural Language Processing Approach to Identify Social Determinants of Health in Electronic Health Records in a Diverse Community Cohort | Machine learning (supervised)                                                                | n-grams, tf-idf                                                               | Housing: Sensitivity = 0.67, Specificity = 0.89, $\kappa$ = 0.51; Medical Care: Sensitivity = 0.55, Specificity = 0.73, $\kappa$ = 0.20; Transportation: Sensitivity = 0.79, Specificity = 0.87, $\kappa$ = 0.58; Combined SDoH: Sensitivity = 0.77, Specificity = 0.69, $\kappa$ = 0.45 | No                   | spaCy                        | Kaiser Permanente Mid-Atlantic States (KPMAS)                      |               |               |
| 223        | 34514351  | Identification of Social Determinants of Health Using Multi-Label Classification of Electronic Health Record Clinical Notes                               | Multi-label Learning (MLL) with various ML models, BI-LSTM, XGBoost, SVM, KNN, Random Forest | Clinical note sentences, tokenization, stemming, lemmatization                | AUC-ROC: 93.9, AP: 0.76, Hamming loss: 0.12                                                                                                                                                                                                                                              | Yes                  | Not specified                | University of North Carolina Health System                         |               |               |
| 166        | 31095055  | Measuring Exposure to Incarceration Using the Electronic Health Record                                                                                    | Natural language processing (NLP) and machine learning                                       | Bag-of-words model with stop word removal. Support vector machine classifier. | Sensitivity: 63.5%, Specificity: 95.9%, F1-score: 0.75, Matthews correlation coefficient: 0.64                                                                                                                                                                                           | No                   | Yale cTAKES extension (YTEX) | Yale University School of Medicine                                 |               |               |

|     |          |                                                                                                                                                                                                               |                                 |                                                                        |                                                                                                                   |     |                            |                                                         |                                                                                                                |
|-----|----------|---------------------------------------------------------------------------------------------------------------------------------------------------------------------------------------------------------------|---------------------------------|------------------------------------------------------------------------|-------------------------------------------------------------------------------------------------------------------|-----|----------------------------|---------------------------------------------------------|----------------------------------------------------------------------------------------------------------------|
| 183 | 28295260 | Hospital Readmission and Social Risk Factors Identified from Physician Notes                                                                                                                                  | MTERMS( Rule-based system )     | Lexicon-based information extraction                                   | Not reported                                                                                                      | Yes | MTERMS NLP System          | Partners Healthcare System                              |                                                                                                                |
| 363 | 29295142 | Assessing the Representation of Occupation Information in Free-Text Clinical Documents across Multiple Sources                                                                                                | Not specified                   | Not specified                                                          | Not reported                                                                                                      | No  | Rule-based                 |                                                         | The study analyzes representation of occupation information in free-text clinical notes from multiple sources. |
| 336 | 35308929 | Creation of a Mapped, Machine-Readable Taxonomy to Facilitate Extraction of Social Determinants of Health Data from Electronic Health Records                                                                 | Rule-based                      | Domain-specific taxonomy, keyword searches                             | N/A                                                                                                               | Yes | N/A                        | Veradigm EHR database                                   |                                                                                                                |
| 340 | 35533516 | A Case for Developing Domain-Specific Vocabularies for Extracting Suicide Factors from Healthcare Notes                                                                                                       | Rule-based                      | Domain-specific lexicons, word2vec for lexicon expansion               | Higher recall than structured data, improved concentration of risk factors in top predicted suicide risk patients | Yes | CLEVER                     | VA Corporate Data Warehouse                             |                                                                                                                |
| 668 | 30975223 | Moonstone: A Novel Natural Language Processing System for Inferring Social Risk from Clinical Narratives                                                                                                      | Rule-based                      | Semantic grammar, inference rules, type hierarchy                      | Precision: 0.66-0.98, Recall: 0.75-0.97, Accuracy: 0.63-0.95                                                      | No  | Moonstone                  | Veterans Health Administration notes                    |                                                                                                                |
| 746 | 35658116 | Prediction of Future Health Care Utilization through Note-Extracted Psychosocial Factors                                                                                                                      | Rule-based                      | Regular expressions, word2vec                                          | Precision >0.9                                                                                                    | Yes | Custom rule-based system   | Oregon Health & Science University EHR                  |                                                                                                                |
| 422 | 33766838 | Text Mining Occupations from the Mental Health Electronic Health Record: A Natural Language Processing Approach Using Records from the Clinical Record Interactive Search (Cris) Platform in South London, Uk | Rule-based and machine learning | Conditional random field classifier, support vector machine classifier | Precision: 0.77-0.79, Recall: 0.77-0.79                                                                           | Yes | Developed on GATE platform | Clinical Record Interactive Search (CRIS) case register |                                                                                                                |
| 635 | 35265945 | Comparative Analysis of Patient Distress in Opioid Treatment Programs Using Natural Language Processing                                                                                                       | Rule-based and machine learning | Custom lexicons, entity extraction                                     | N/A                                                                                                               | Yes | CLAMP                      | Mount Sinai Health System OTP database                  |                                                                                                                |
| 252 | 32308819 | Determination of Marital Status of Patients from Structured and Unstructured Electronic Healthcare Data                                                                                                       | Rule-based NLP                  | N-grams, Vocabulary Mapping, Context Detection, Document Inference     | NLP Engine: F1 Score 0.97 (document-level), 0.95 (patient-level); Machine Learning: F1 Score 0.63                 | Yes | EasyCIE                    | University of Utah Health Sciences Center               |                                                                                                                |



|     |          |                                                                                                                                                                                                                 |                                                                                       |                                                                                                                                |                                                                                                                                  |     |                                                |                                                                                                                  |
|-----|----------|-----------------------------------------------------------------------------------------------------------------------------------------------------------------------------------------------------------------|---------------------------------------------------------------------------------------|--------------------------------------------------------------------------------------------------------------------------------|----------------------------------------------------------------------------------------------------------------------------------|-----|------------------------------------------------|------------------------------------------------------------------------------------------------------------------|
| 321 | 35224458 | Development and Assessment of a Natural Language Processing Model to Identify Residential Instability in Electronic Health Records' Unstructured Data: A Comparison of 3 Integrated Healthcare Delivery Systems | Rule-based NLP                                                                        | Expert-developed patterns, vocabulary mapping, negation handling                                                               | PPV: 0.45-1.00, Sensitivity: 0.68-0.96, Specificity: 0.69-1.00                                                                   | Yes | EntityRuler module of spaCy 2.3 Python toolkit | Johns Hopkins Health System (JHHS), Kaiser Permanente Mid-Atlantic States (KPMAS), KP Southern California (KPSC) |
| 459 | 34474188 | Rehoused: A Novel Measurement of Veteran Housing Stability Using Natural Language Processing                                                                                                                    | Rule-based NLP system                                                                 | Defined entity classes related to homelessness and stable housing. Used semantic and syntactic patterns for entity extraction. | Moderate document classification performance (F1 0.658). Patient-level classification aligned well with reference standard data. | Yes | Custom rule-based system in medspaCy           | US Department of Veterans Affairs                                                                                |
| 297 | 28807893 | Optimizing the Use of Electronic Health Records to Identify High-Risk Psychosocial Determinants of Health                                                                                                       | Rule-based NLP, Word Recognition Software                                             | Natural Language Processing, Term Indexing, Data Aggregation, Negation Detection, Date Detection                               | Precision: 0.80, Recall: 0.98, Balanced F-measure: 0.88                                                                          | Yes | QPID (Queryable Patient Inference Dossier)     | Massachusetts General Hospital                                                                                   |
| 313 | 37128364 | An Investigation of the Representation of Social Determinants of Health in the Umls                                                                                                                             | Rule-based NLP, clinicalBERT-based classification, ML classifiers (LR, RF, K-Nearest) | Dictionaries, semantic types                                                                                                   | Extracted 198,677 SDoH concepts, 91% classification accuracy                                                                     | No  | Clinical BERT, EASE                            | UMLS, Veteran Health Administration's EHR data                                                                   |
| 442 | 34513783 | Measuring the Value of a Practical Text Mining Approach to Identify Patients with Housing Issues in the Free-Text Notes in Electronic Health Record: Findings of a Retrospective Cohort Study                   | Rule-based text mining using regular expressions (RegEx)                              | Developed linguistic patterns and phrases for 5 categories of housing issues                                                   | High precision (96-95-94% at phrase, note, patient level), low recall (30-32-41% at phrase, note, patient level)                 | Yes | Custom RegEx patterns                          | Large multispecialty medical group in New England, USA                                                           |
| 246 | 35309014 | A Study of Social and Behavioral Determinants of Health in Lung Cancer Patients Using Transformers-Based Natural Language Processing Models                                                                     | Supervised deep learning - (Transformers: BERT, RoBERTa)                              | (Transformers: BERT, RoBERTa)                                                                                                  | Best F1-score: 0.8791 (strict), 0.8999 (lenient) for BERT_general                                                                | Yes | not specified                                  | University of Florida Health Integrated Data Repository                                                          |
| 181 | 36560764 | Clinical Application of Detecting Covid-19 Risks: A Natural Language Processing Approach                                                                                                                        | Supervised deep learning - BiLSTM-CNN-CRF model with transformer-based embeddings     | BiLSTM, CNN, CRF layers; Transformer embeddings                                                                                | Micro-F1: 0.949, Macro-F1: 0.9537                                                                                                | No  | Not specified                                  | MIMIC Dataset PubMed LitCOVID                                                                                    |

|     |          |                                                                                                                                                                         |                                                                                                                         |                                                                                                                                                      |                                                                                                                     |     |                                       |                                                 |                              |
|-----|----------|-------------------------------------------------------------------------------------------------------------------------------------------------------------------------|-------------------------------------------------------------------------------------------------------------------------|------------------------------------------------------------------------------------------------------------------------------------------------------|---------------------------------------------------------------------------------------------------------------------|-----|---------------------------------------|-------------------------------------------------|------------------------------|
| 175 | 35007754 | Classifying Social Determinants of Health from Unstructured Electronic Health Records Using Deep Learning-Based Natural Language Processing                             | Supervised deep learning - CNN, LSTM, BERT                                                                              | CNN: Convolutional layers, max pooling, dropout regularization; LSTM: Recurrent layers, dropout regularization; BERT: Pre-trained transformer layers | BERT: Micro-F1 0.69, Macro-AUC 0.907                                                                                | No  | Not specified                         | MIMIC Dataset                                   |                              |
| 468 | 37011635 | A Marker-Based Neural Network System for Extracting Social Determinants of Health                                                                                       | Supervised deep learning - Multi-stage pipeline with marker-based NER, relation classification, and text classification | Novel marker-based NER model, contextualized embeddings (BERT)                                                                                       | F1 of 0.9101, 0.8053, and 0.9025 on N2C2 dataset. State-of-the-art compared to other shared task systems.           | No, | Custom pipeline                       | MIMIC Dataset                                   | UW Harborview Medical Center |
| 164 | 35419333 | Assessing the Documentation of Social Determinants of Health for Lung Cancer Patients in Clinical Narratives                                                            | Supervised deep learning - Transformer-based NLP model using BERT architecture                                          | Masked language modeling                                                                                                                             | F1-score 0.9216                                                                                                     | No  | BERT-based NLP pipeline               | University of Florida Health (UF Health) IDR    |                              |
| 612 | 34747714 | Risk Factors Associated with Nonfatal Opioid Overdose Leading to Intensive Care Unit Admission: A Cross-Sectional Study                                                 | Supervised deep learning (BERT)                                                                                         | Word-level annotations                                                                                                                               | 99.82% of SBDH from NLP vs 0.18% from structured data                                                               | Yes | BERT                                  | MIMIC Dataset                                   |                              |
| 645 | 37002953 | Extracting Social Determinants of Health Events with Transformer-Based Multitask, Multilabel Named Entity Recognition                                                   | Supervised deep learning (BioClinicalBERT)                                                                              | 2-stage architecture, multi-label NER                                                                                                                | 0.87 precision, 0.89 recall, 0.88 F1                                                                                | No  | Custom model based on BioClinicalBERT | n2c2 Track 2 competition dataset                |                              |
| 520 | 37130345 | Leveraging Natural Language Processing to Augment Structured Social Determinants of Health Data in the Electronic Health Record                                         | Supervised deep learning (mSpERT model)                                                                                 | Contextualized embeddings (BERT), multi-task learning                                                                                                | 0.86 F1 on test set, 0.77-0.86 F1 on validation notes                                                               | Yes | mSpERT model                          | University of Washington Medicine               |                              |
| 484 | 36920391 | Associations between Natural Language Processing-Enriched Social Determinants of Health and Suicide Death among Us Veterans                                             | Supervised deep learning (RoBERTa model)                                                                                | Contextualized word embeddings, multi-task learning framework                                                                                        | No accuracy metrics reported                                                                                        | Yes | Custom RoBERTa model                  | US Veterans Health Administration               |                              |
| 672 | 33791684 | Automated Coding of under-Studied Medical Concept Domains: Linking Physical Activity Reports to the International Classification of Functioning, Disability, and Health | Supervised deep learning (SVM, KNN, DNN) and deep learning (BERT)                                                       | Word embeddings, ICF code definitions                                                                                                                | 84% macro F1 score                                                                                                  | No  | Custom implementations                | Physical therapy notes from NIH Clinical Center |                              |
| 398 | 31438179 | Identifying Patients with Significant Problems Related to Social Determinants of Health with Natural Language Processing                                                | Unsupervised learning                                                                                                   | Lexical association metrics like $\chi^2$ test for query expansion, TF-IDF for document ranking                                                      | Precision >0.90 for all concepts except social isolation after iterative improvements (initial precision 0.60-0.68) | Yes | Not specified                         | Oregon Health & Science University              |                              |

|     |          |                                                                                                                                                                               |                                                        |                                                                                                                        |                                                                                |    |                                                                |                                                                                                                       |
|-----|----------|-------------------------------------------------------------------------------------------------------------------------------------------------------------------------------|--------------------------------------------------------|------------------------------------------------------------------------------------------------------------------------|--------------------------------------------------------------------------------|----|----------------------------------------------------------------|-----------------------------------------------------------------------------------------------------------------------|
| 501 | 29016793 | Mining 100 Million Notes to Find Homelessness and Adverse Childhood Experiences: 2 Case Studies of Rare and Severe Social Determinants of Health in Electronic Health Records | Unsupervised learning and information retrieval system | word2vec for query expansion, TF-IDF weighted cosine similarity for retrieval                                          | Homelessness: P@185 0.93, AUPRC 0.95. ACE: P@1000 0.70, AUPRC 0.73             | No | Custom information retrieval system                            | Vanderbilt University Medical Center Synthetic Derivative database                                                    |
| 274 | 32570369 | Discovering New Social Determinants of Health Concepts from Unstructured Data: Framework and Evaluation                                                                       | Word Embedding Model, Human-in-the-loop                | Word Embedding Techniques, Euclidean Distance for Term Similarity, Skip-gram Model with Negative Sampling, Subsampling | Not explicitly provided (Focused on term discovery and matching, not accuracy) | No | Custom-built model using state-of-the-art embedding techniques | IBM Research, Ireland; NIHR Greater Manchester Patient Safety Translational Research Centre, University of Manchester |

| EndNo | PubMed_ID | Title                                                                                                                                                | Study types                                       | Assesse d | Bias type | Health event                                                                 | diseases                                                                    | prevention method                  | quality measures                                                                                                                                                                | definitions(standard/com e up )                                                                                       | prediction model/not | Comment |
|-------|-----------|------------------------------------------------------------------------------------------------------------------------------------------------------|---------------------------------------------------|-----------|-----------|------------------------------------------------------------------------------|-----------------------------------------------------------------------------|------------------------------------|---------------------------------------------------------------------------------------------------------------------------------------------------------------------------------|-----------------------------------------------------------------------------------------------------------------------|----------------------|---------|
| 147   | 36367672  | Association between Gentrification and Health and Healthcare Utilization                                                                             | Retrospective Cohort                              | No        | N/A       | Health and Healthcare Utilization                                            | Cardiovascular Disease, Hypertension, Diabetes, Obesity, Asthma, Depression | Not Specified                      | Multivariable Logistic and Poisson Regression Models                                                                                                                            | Not Specified                                                                                                         | No                   |         |
| 153   | 35725136  | Race Versus Social Determinants of Health in Covid-19 Hospitalization Prediction                                                                     | Observational Study                               | No        | N/A       | COVID-19 Hospitalization                                                     | Cardiometabolic Diseases                                                    | Not Specified                      | hospitalization rates                                                                                                                                                           | Not Specified                                                                                                         | Yes                  |         |
| 154   | 35420651  | Association between Social Determinants of Health and Retinopathy of Prematurity Outcomes                                                            | Retrospective Cohort Study                        | No        | N/A       | Diagnosis and severity of Retinopathy of Prematurity (ROP)                   | Retinopathy of Prematurity                                                  | Not specified                      | Outcome measures include diagnosis and severity of ROP, determined by a classification system developed by the Early Treatment for Retinopathy of Prematurity Cooperative Group | Standard (STROBE reporting guidelines, American Academy of Pediatrics guidelines for ROP screening)                   | No                   |         |
| 158   | 36475934  | Social Determinants of Health and Hypertension Control in Adults with Medicaid                                                                       | Retrospective Analysis                            | No        | N/A       | Hypertension Control                                                         | Hypertension                                                                | Not specified                      | Blood pressure measurement, control of hypertension                                                                                                                             | Standard (United States Department of Agriculture's Adult Food Security Survey Module, Weekly Stress Inventory, etc.) | No                   |         |
| 160   | 36561097  | Social Determinants of Health Influence Early Outcomes Following Lumbar Spine Surgery                                                                | Retrospective Observational Study                 | No        | N/A       | Postoperative Outcomes (Length of Stay, Discharge Disposition, Readmissions) | Lumbar Spine Surgery                                                        | Not specified                      | Length of stay (LOS), Discharge to skilled nursing facility, 30-day emergency department return, 30-day readmission                                                             | Custom (Self-Reported Social Determinants of Health Survey)                                                           | No                   |         |
| 162   | 35864034  | Social Determinants of Health Associated with Patient Portal Use in Pediatric Diabetes                                                               | Cross-Sectional Study                             | No        | N/A       | Patient portal utilization                                                   | Type 1 Diabetes                                                             | Not specified                      | Association between SDOH and patient portal use in pediatric diabetes                                                                                                           | Custom (ON-Marg, deprivation index used in Canada)                                                                    | No                   |         |
| 170   | 35822762  | Ethnicity, Social Determinants of Health, and Pediatric Primary Care During the Covid-19 Pandemic                                                    | Retrospective Study                               | No        | N/A       | Pediatric Primary Care during COVID-19                                       | COVID-19 Impact on Pediatric Healthcare                                     | Not specified                      | Health outcomes (routine medical care delay, vaccine delays, utilization of acute and ED visits)                                                                                | Custom (Self-Reported Social Determinants of Health Survey)                                                           | No                   |         |
| 172   | 35060411  | Minnesota Electronic Health Record Consortium Covid-19 Project: Informing Pandemic Response through Statewide Collaboration Using Observational Data | Serial Cross-Sectional Study                      | No        | N/A       | COVID-19 Pandemic Monitoring                                                 | COVID-19                                                                    | Disease and Syndromic Surveillance | COVID-19 Testing Rates and Positivity                                                                                                                                           | Custom (EHR Data Analysis)                                                                                            | No                   |         |
| 177   | 36031449  | Social Determinants of Health in Pediatric Scald Burns: Is Food Access an Issue?                                                                     | Retrospective Observational Study                 | No        | N/A       | Pediatric scald burns                                                        | Scald burns                                                                 | Not specified                      | Association between scald burns and various factors, including socioeconomic status, race, and access to food                                                                   | CDC Social Vulnerability Index                                                                                        | No                   |         |
| 184   | 33948528  | Socioeconomic Determinants of Tertiary Rhinology Care Utilization                                                                                    | Retrospective review of electronic health records | No        | -         | Utilization of tertiary rhinology care services                              | Chronic Rhinosinusitis (CRS)                                                | -                                  | Utilization rates, correlation with census data, multivariate regression analyses                                                                                               | Standard (International Classification of Diseases, Ninth and Tenth Revision codes)                                   | No                   |         |

|     |          |                                                                                                                                    |                                         |    |     |                                                                                   |                                                                                  |                                                                  |                                                                                                                                                           |                                                                                                     |    |
|-----|----------|------------------------------------------------------------------------------------------------------------------------------------|-----------------------------------------|----|-----|-----------------------------------------------------------------------------------|----------------------------------------------------------------------------------|------------------------------------------------------------------|-----------------------------------------------------------------------------------------------------------------------------------------------------------|-----------------------------------------------------------------------------------------------------|----|
| 187 | 33537273 | Multi-Morbidity in the Older Person: An Examination of Polypharmacy and Socioeconomic Status                                       | Descriptive analysis, literature review | No | -   | Managing multi-morbidity in older adults, risk of polypharmacy                    | Multi-morbidity                                                                  | Social prescribing, use of EHRs, redistributive welfare policies | -                                                                                                                                                         | -                                                                                                   | No |
| 191 | 36653224 | Role of Race and Insurance Status in Prostate Cancer Diagnosis-to-Treatment Interval                                               | Retrospective Observational Study       | No | N/A | Prostate Cancer Diagnosis-to-Treatment Interval                                   | Prostate Cancer                                                                  | N/A                                                              | the interval between multiparametric MRI (mpMRI)-to-biopsy and biopsy-to-prostatectomy in prostate cancer patients                                        | Not Specified                                                                                       | No |
| 192 | 36427682 | Substance Use Disorders and Social Determinants of Health from Electronic Medical Records Obtained During Kentucky's "Triple Wave" | Retrospective analysis of EMRs          | No | -   | Substance use disorders in the context of social determinants of health           | Opioid Use Disorder (OUD), Stimulant Use Disorder, Polysubstance Use             | -                                                                | Utilization of healthcare services, housing instability, co-morbid mental and physical health conditions, drug-related events                             | Standard (ICD-10-CM codes)                                                                          | No |
| 196 | 33512511 | Determinants of Stage at Diagnosis of Hpv-Related Cancer Including Area Deprivation and Clinical Factors                           | Retrospective case-control study        | No | -   | HPV-related cancers                                                               | HPV-related cancers (anal, cervical, oropharyngeal, penile, vulvar, vaginal)     | -                                                                | SEER stage guidelines, Area Deprivation Index (ADI)                                                                                                       | Standard (ICD-9, ICD-10, American Community Survey)                                                 | No |
| 198 | 35673163 | Using Ehr Data to Identify Social Determinants of Health Affecting Disparities in Cancer Survival                                  | Observational Study                     | No | N/A | Cancer Survival                                                                   | Lung Cancer, Colorectal Cancer, Breast Cancer, Multiple Myeloma, Prostate Cancer | N/A                                                              | Survival time (short survival <1 year, long survival >5 years), Logistic Regression Analysis                                                              | Standard (uses established age groups and race categories)                                          | No |
| 207 | 25559099 | Linking Electronic Health Records with Community-Level Data to Understand Childhood Obesity Risk                                   | Retrospective Observational Study       | No | N/A | Assessing childhood obesity risk based on environmental and socioeconomic factors | Childhood obesity                                                                | Not specified                                                    | Association between the economic hardship index (EHI) and race/ethnicity, age, sex and childhood obesity rates in Wisconsin children using an EHR dataset | Standard (economic hardship index (EHI) and race/ethnicity, age and sex )                           | No |
| 211 | 33757936 | Social Determinants of Health and Coronavirus Disease 2019 in Pregnancy                                                            | Cross-Sectional Study                   | No | N/A | SARS-CoV-2 Infection and COVID-19 Severity                                        | COVID-19                                                                         | N/A                                                              | Polymerase Chain Reaction Test Positivity, Severity of Illness Categories                                                                                 | Standard (Uses established socioeconomic and demographic categories)                                | No |
| 215 | 33359151 | Neighborhood Socioeconomic Status and Identification of Patients with Ckd Using Electronic Health Records                          | Observational Study                     | No | N/A | Chronic Kidney Disease (CKD) Prevalence                                           | Chronic Kidney Disease (CKD)                                                     | N/A                                                              | Prevalence of CKD, estimated glomerular filtration rate, proteinuria                                                                                      | Standard (Uses Census tract neighborhood SES measures and individual-level health insurance status) | No |
| 220 | 30834776 | Geospatial, Clinical, and Social Determinants of Hospital Readmissions                                                             | Retrospective Cohort Study              | No | N/A | 90-day readmission                                                                | Not specified                                                                    | N/A                                                              | Association between 90-day readmission and geospatial-sociodemographics and clinical characteristics                                                      | Standard (American Community Survey)                                                                | No |
| 221 | 33220754 | Demographic Correlates of Veterans' Adverse Social Determinants of Health                                                          | Cross-Sectional Study                   | No | N/A | At least one outpatient encounter or inpatient admission                          | Not specified                                                                    | N/A                                                              | Association between demographics and adverse SDOH                                                                                                         | Standard (ICD-10, VA specific codes)                                                                | No |
| 225 | 35676746 | Return Visits to the Emergency Department: An Analysis Using Group Based Curve Models                                              | Retrospective Observational Study       | No | N/A | Return visits to ED                                                               | Not specified                                                                    | N/A                                                              | Association between return visits to ED and patient characteristics (clinical diagnosis, EHR, SDOH)                                                       | Standard (US Census data, data from Indiana Network for Patient Care)                               | No |
| 229 | 32739860 | Social Determinants and Emergency Department Utilization: Findings from the Veterans Health Administration                         | Cross-Sectional Study                   | No | N/A | ED visits                                                                         | Not specified                                                                    | N/A                                                              | Association between ED visits and seven indicators of SDOH                                                                                                | Standard (ICD-10, VA specific codes)                                                                | No |

|     |          |                                                                                                                                                 |                                     |    |     |                                                               |                                                          |                            |                                                                                                                                        |                                                                                                                                                                                                                                                                                                                                                                           |     |
|-----|----------|-------------------------------------------------------------------------------------------------------------------------------------------------|-------------------------------------|----|-----|---------------------------------------------------------------|----------------------------------------------------------|----------------------------|----------------------------------------------------------------------------------------------------------------------------------------|---------------------------------------------------------------------------------------------------------------------------------------------------------------------------------------------------------------------------------------------------------------------------------------------------------------------------------------------------------------------------|-----|
| 231 | 34969350 | Social Determinants Associated with Loss of an Eye in the United States Using the All of Us Nationwide Database                                 | Case-controlled study               | No | N/A | Loss of an eye                                                | ocular trauma, ocular tumors, and severe endophthalmitis | N/A                        | Association between the loss of an eye and SDOH                                                                                        | Standard (ICD0-10, US Census data)                                                                                                                                                                                                                                                                                                                                        |     |
| 234 | 35352489 | Associations between Cardiometabolic Disease Severity, Social Determinants of Health (Sdoh), and Poor Covid-19 Outcomes                         | Retrospective Longitudinal Study    | No | N/A | COVID-19 outcomes (hospitalization, ICU admission, mortality) | Cardiometabolic Diseases                                 | Not specified              | Outcome Measures (hospitalization, ICU admission, mortality), CMDS (Cardiometabolic Disease Staging)                                   | Standard (CMDS scores, SDOH measures)                                                                                                                                                                                                                                                                                                                                     | Yes |
| 236 | 36381875 | Socioeconomic and Comorbid Factors Affecting Mortality and Length of Stay in Covid-19 Patients                                                  | Retrospective Study                 | No | N/A | COVID-19 outcomes (Length of Stay and In-hospital Mortality)  | COVID-19                                                 | Not specified              | Outcome Measures (Length of Stay, In-hospital Mortality), Comorbidities (Elixhauser Comorbidity Index)                                 | Standard (Elixhauser Comorbidity Index)                                                                                                                                                                                                                                                                                                                                   | Yes |
| 239 | 32880954 | Relative Accuracy of Social and Medical Determinants of Suicide in Electronic Health Records                                                    | Observational Study                 | No | N/A | Suicide or intentional self-injury                            | Suicide and Self-Harm                                    | Not specified              | Predictive accuracy of suicide or intentional self-injury using ICD codes                                                              | Custom (Using ICD-9 codes for SDOH and medical diagnoses)                                                                                                                                                                                                                                                                                                                 | Yes |
| 244 | 36161141 | Food Insecurity, Social Needs, and Smoking Status among Patients in a County Hospital System                                                    | Retrospective Observational Study   | No | N/A | Smoking                                                       | Smoking                                                  | Not specified              | Association between smoking and food insecurity or other social needs                                                                  | Custom (Hunger Vital Sign, National Association of Community Health Centers' Protocol for Responding to and Assessing Patients' Assets, Risks, and Experiences)                                                                                                                                                                                                           | No  |
| 257 | 32675271 | The Impact of Social and Clinical Complexity on Diabetes Control Measures                                                                       | Retrospective cohort study          | No | -   | Poor glucose control (HbA1c > 9%)                             | Diabetes Mellitus                                        | Not specifically mentioned | Quality of diabetes control (measured by HbA1c values), Charlson Comorbidity Index, Social Deprivation Index                           | Standard (utilized the Charlson Comorbidity Index and Social Deprivation Index)                                                                                                                                                                                                                                                                                           | No  |
| 260 | 31003812 | The Impact of Social Determinants of Health on Hospitalization in the Veterans Health Administration                                            | Retrospective Observational Study   | No | N/A | Hospitalization (overnight stay in a VHA hospital)            | Not specified                                            | N/A                        | Association between hospitalization rates and SDOH variables                                                                           | Standard (US Census data and American Community Survey)                                                                                                                                                                                                                                                                                                                   | No  |
| 266 | 36245804 | Patient Characteristics and Neighborhood Attributes Associated with Hepatitis C Screening and Positivity in Philadelphia                        | Retrospective Observational Study   | No | N/A | Hepatitis C Screening and Positivity                          | Hepatitis C                                              | N/A                        | Association between hepatitis screening/positivity and SDOH                                                                            | Standard (US Census tract)                                                                                                                                                                                                                                                                                                                                                |     |
| 267 | 36490368 | Characterizing Primary Care Patients with Posttraumatic Stress Disorder Using Electronic Medical Records: A Retrospective Cross-Sectional Study | Retrospective cross-sectional study | No | -   | PTSD diagnosis                                                | PTSD                                                     | Not specified              | IV: deprivation (e.g., material and social); DV: record of PTSD diagnosis ICD-9 code (309.81) or dianosis text with PTSD-related words | Standard and custom - IV: material deprivation (the lack of the goods and conveniences within the individual's dissemination area), social deprivation (social network including living alone, marital status, single-parent families); DV: PTSD = a constellation of specific disruptive psychiatric symptoms after having experienced, or witnessed, a traumatic event; | Yes |

|     |          |                                                                                                                                                                      |                                                   |    |     |                                                                                                                                                            |                                                                                                                                 |                            |                                                                                                                                                                                           |                                                                                                                                                                                                                                                                                   |     |
|-----|----------|----------------------------------------------------------------------------------------------------------------------------------------------------------------------|---------------------------------------------------|----|-----|------------------------------------------------------------------------------------------------------------------------------------------------------------|---------------------------------------------------------------------------------------------------------------------------------|----------------------------|-------------------------------------------------------------------------------------------------------------------------------------------------------------------------------------------|-----------------------------------------------------------------------------------------------------------------------------------------------------------------------------------------------------------------------------------------------------------------------------------|-----|
| 268 | 34212757 | Area Deprivation Index and Cardiac Readmissions: Evaluating Risk-Prediction in an Electronic Health Record                                                           | Retrospective observational analysis              | No | -   | 30-day and 1-year readmission and mortality following hospitalization                                                                                      | Heart Failure, Myocardial Ischemia, Atrial Fibrillation                                                                         | Not specifically mentioned | Readmission and mortality rates, Cox proportional hazards models, C-statistic, net reclassification index                                                                                 | Standard (utilized Area Deprivation Index and other standard clinical variables)                                                                                                                                                                                                  | Yes |
| 269 | 28161034 | Impact of Social Determinants of Health on Medical Conditions among Transgender Veterans                                                                             | Retrospective observational analysis              | No | -   | Prevalence and associations of social determinants with medical conditions                                                                                 | Mood Disorder, PTSD, Alcohol Abuse Disorder, Illicit Drug Abuse Disorder, Tobacco Use Disorder, Suicidal Risk, HIV, Hepatitis C | Not specified              | Prevalence of social determinants and their associations with medical conditions                                                                                                          | Standard (utilized ICD-9 diagnosis codes and VA administrative data)                                                                                                                                                                                                              | No  |
| 273 | 31831290 | Association between Social and Economic Needs with Future Healthcare Utilization                                                                                     | Retrospective case/control analysis               | No | -   | Healthcare utilization (Primary care, emergency department, or urgent care visit at Kaiser Permanente Northwest from October 1, 2016 to November 31, 2017) | Not specified                                                                                                                   | Not specified              | IV: Social or economic needs, DV: Future Hospitalization and ED visits                                                                                                                    | Standard and custom - IV: Social and economical needs (based on ICD-10-CM codes (e.g., insufficient social insurance or welfare support, homelessness, unemployment)); DV: Future hospital and ED visit (presence or absence of any hospitalization or ED visit in the 12 months) | Yes |
| 281 | 28341220 | National Academy of Medicine Social and Behavioral Measures: Associations with Self-Reported Health                                                                  | Survey study                                      | No | -   | Associations of social and behavioral determinants of health with self-reported physical and mental health                                                 | Physical and Mental Health                                                                                                      | Not specified              | Associations between social and behavioral determinants and global physical and mental health                                                                                             | Standard (used NAM panel of SBD measures, SF-12 survey, MCSD Scale)                                                                                                                                                                                                               | No  |
| 284 | 36112581 | Associations of Four Indexes of Social Determinants of Health and Two Community Typologies with New Onset Type 2 Diabetes across a Diverse Geography in Pennsylvania | Nested Case-Control Study                         | No | N/A | Onset of Type 2 Diabetes                                                                                                                                   | Type 2 Diabetes                                                                                                                 | N/A                        | Associations of SDOH indexes and community typologies with Type 2 Diabetes; Adjustments for confounding variables (age, sex, race, ethnicity, Medical Assistance status, and tobacco use) | Standard (Based on American Community Survey 2015 data for SDOH indicators)                                                                                                                                                                                                       | No  |
| 285 | 36315199 | Multiple Electronic Health Record-Based Measures of Social Determinants of Health to Predict Return to the Emergency Department Following Discharge                  | Retrospective cross-sectional observational study | No | -   | Readmission                                                                                                                                                | Not specified                                                                                                                   | Not specified              | IV: Economic and social resources, Living and working conditions, personal health behaviors, health status and disability; DV: Return to the emergency department                         | Standard (Academic Health Science Center) and custom                                                                                                                                                                                                                              | Yes |

|     |          |                                                                                                                                                                                                                  |                                   |     |                           |                                                                |                                                                                                                                                                                                                                                                                                                                                                                  |               |                                                                                                                                                                             |                                                                                  |     |
|-----|----------|------------------------------------------------------------------------------------------------------------------------------------------------------------------------------------------------------------------|-----------------------------------|-----|---------------------------|----------------------------------------------------------------|----------------------------------------------------------------------------------------------------------------------------------------------------------------------------------------------------------------------------------------------------------------------------------------------------------------------------------------------------------------------------------|---------------|-----------------------------------------------------------------------------------------------------------------------------------------------------------------------------|----------------------------------------------------------------------------------|-----|
| 286 | 35171031 | Association of Unmet Social Needs with Chronic Illness: A Cross-Sectional Study                                                                                                                                  | Observational Study               | No  | N/A                       | Common chronic illnesses (cancer, anemia, diabetes, etc.)      | cancer (excluding skin cancers), anemia, diabetes, hyperlipidemia, substance use disorder, hypertension, psychiatric illness (including depression, anxiety, post-traumatic stress disorder), cardiovascular disease (including stroke, myocardial infarction, and congestive heart failure), obesity, chronic obstructive pulmonary disease, asthma, and chronic kidney disease | Not specified | Associations between social needs and chronic illnesses                                                                                                                     | Standard (ICD-10)                                                                | No  |
| 289 | 33041232 | Association of Social Behaviors with Community Discharge in Patients with Total Hip and Knee Replacement                                                                                                         | Retrospective cohort study        | No  | N/A                       | Community discharge after elective total joint arthroplasty    | Joint arthroplasty                                                                                                                                                                                                                                                                                                                                                               | Not specified | Association between SDOH and community discharge after elective total joint arthroplasty                                                                                    | Standard (ICD-9 and ICD-10)                                                      | No  |
| 301 | 29893618 | Race/Ethnicity, Socioeconomic Status, and Healthcare Intensity at the End of Life                                                                                                                                | Retrospective Observational Study | No  | N/A                       | End of life (Death)                                            | Cancers with poor prognoses, chronic pulmonary disease, coronary artery disease, heart failure, severe chronic liver disease, chronic renal failure, dementia, diabetes with end-organ damage, and peripheral vascular disease.                                                                                                                                                  | N/A           | Association between race/ethnicity, social determinants of health, and healthcare intensity in the last 30 days of life for individuals with chronic, life-limiting illness | Standard (ICD-10)                                                                | No  |
| 302 | 35704625 | Associations between Healthcare Utilization and Access and Diabetic Retinopathy Complications Using All of Us Nationwide Survey Data                                                                             | Retrospective cohort study        | No  | N/A                       | Healthcare utilization and access                              | Diabetic retinopathy                                                                                                                                                                                                                                                                                                                                                             | N/A           | Associations between healthcare utilization and access and diabetic retinopathy complications                                                                               | Standard (ICD-10)                                                                | No  |
| 304 | 34848998 | Social Determinants of Health Correlating with Mechanical Ventilation of Covid-19 Patients: A Multi-Center Observational Study                                                                                   | Multi-Center Observational Study  | Yes | Race, Poverty, Disability | Mechanical Ventilation of COVID-19 Patients                    | COVID-19                                                                                                                                                                                                                                                                                                                                                                         | Not Specified | association between SDOH and mechanical ventilation (MV).                                                                                                                   | Standard (EMR + US Census)                                                       | Yes |
| 308 | 35688597 | Multilevel Determinants of Racial/Ethnic Disparities in Severe Maternal Morbidity and Mortality in the Context of the Covid-19 Pandemic in the USA: Protocol for a Concurrent Triangulation, Mixed-Methods Study | Retrospective Study               | Yes | racial/ethnic             | severe maternal morbidity and mortality (SMMM) during covid-19 | SMMM                                                                                                                                                                                                                                                                                                                                                                             | Not Specified | racial/ethnic disparities in SMMM with COVID-19                                                                                                                             | Standard (Data from S3C, N3C, ACS, AHA combined)                                 | No  |
| 324 | 24886134 | Community-Level Determinants of Obesity: Harnessing the Power of Electronic Health Records for Retrospective Data Analysis                                                                                       | Retrospective observational study | No  | N/A                       | Obesity                                                        | Obesity                                                                                                                                                                                                                                                                                                                                                                          | N/A           | Association between obesity and SDOH                                                                                                                                        | Custom (OSUWMC, Nielsen PrimeLocation, NAICS, Manual compilation of directories) | No  |
| 333 | 28708848 | Predicting All-Cause Risk of 30-Day Hospital Readmission Using Artificial Neural Networks                                                                                                                        | Retrospective observational study | No  | N/A                       | 30-day readmission                                             | Not specified                                                                                                                                                                                                                                                                                                                                                                    | N/A           | Association between 30-day readmission and patient EHR/SDOH data                                                                                                            | Standard (American Community Survey ,US Census data                              | No  |



|     |          |                                                                                                                                                                                           |                                          |     |      |                                                                          |                                                                                         |                      |                                                                                                                                                                   |                                                                              |     |
|-----|----------|-------------------------------------------------------------------------------------------------------------------------------------------------------------------------------------------|------------------------------------------|-----|------|--------------------------------------------------------------------------|-----------------------------------------------------------------------------------------|----------------------|-------------------------------------------------------------------------------------------------------------------------------------------------------------------|------------------------------------------------------------------------------|-----|
| 335 | 32967923 | Prevalence of Social Risks on Inpatient Screening and Their Impact on Pediatric Care Use                                                                                                  | Survey study                             | No  | N/A  | Pediatric Care/Not Specified                                             | Pediatric Care/Not Specified                                                            | N/A                  | Multiple, including LOS Increase and complex chronic conditions                                                                                                   | Custom (screening survey was developed in 2015 by a multidisciplinary group) | No  |
| 344 | 28438048 | The Impact of Infant Well-Child Care Compliance and Social Risks on Emergency Department Utilization                                                                                      | Retrospective Observational Study        | No  | N/A  | ED (Emergency department) visits                                         | ED visits (No specific diseases mentioned)                                              | N/A                  | Associations between the number of completed well-child visits or reported social risks and ED utilization                                                        | Standard (Emergency Severity Index)                                          | No  |
| 346 | 36503669 | Caries Risk and Social Determinants of Health: A Big Data Report                                                                                                                          | Retrospective cross-sectional study      | No  | N/A  | Caries risk                                                              | Caries                                                                                  | N/A                  | Association between caries risk and SDOH (SDI)                                                                                                                    | Standard (CDT (Current Dental Terminology), Social Deprivation Index in ACS) | No  |
| 349 | 33215073 | Using Electronic Health Records for Population Health Sciences: A Case Study to Evaluate the Associations between Changes in Left Ventricular Ejection Fraction and the Built Environment | Retrospective observational study        | No  | N/A  | Changes in ejection fraction                                             | Heart failure                                                                           | N/A                  | Associations between SDOH and changes in ejection fraction (EF)                                                                                                   | Standard (ICD-9, ICD-10)                                                     | No  |
| 350 | 35656210 | Health Care Utilization among Women of Reproductive Age Living in Public Housing: Associations across Six Public Housing Sites in San Francisco                                           | Retrospective Study                      | No  | N/A  | Outpatient and ED visits                                                 | N/A                                                                                     | Not Specified        | incidence rate ratios (IRR) for outpatient visits (count) and odds ratios (OR) for ED visit                                                                       | Standard                                                                     | No  |
| 371 | 32860253 | Relationship of Neighborhood Social Determinants of Health on Racial/Ethnic Mortality Disparities in Us Veterans-Mediation and Moderating Effects                                         | Retrospective cohort study               | No  | N/A  | Mortality (Death)                                                        | Not specified                                                                           | N/A                  | Association between SDOH and mortality rates                                                                                                                      | Custom (Area deprivation index, also standard (US Census Data))              | No  |
| 373 | 33079198 | Patient-Reported Social and Behavioral Determinants of Health and Estimated Risk of Hospitalization in High-Risk Veterans Affairs Patients                                                | Survey study                             | No  | N/A  | 90-day and 180-day all-cause hospitalizations                            | Not specified                                                                           | N/A                  | Estimation of 90-day and 180-day hospitalization risk using SDOH data                                                                                             | Custom (VA specific definitions)                                             | Yes |
| 378 | 35308954 | Testing of a Risk-Standardized Complication Rate Electronic Clinical Quality Measure (Ecqm) for Total Hip and/or Total Knee Arthroplasty                                                  | Observational retrospective cohort study | No  | N/A  | Complications within 90 days of Total Hip and/or Total Knee Arthroplasty | Total Hip and/or Total Knee Arthroplasty                                                | N/A                  | Assessment of the risk-standardized complication rate (RSCR) following elective primary total hip (THA) and knee arthroplasty (TKA) at the clinician group level. | Custom (NQF1550 and NQF3493)                                                 | No  |
| 382 | 34348133 | The Association between Social Needs and Chronic Conditions in a Large, Urban Primary Care Population                                                                                     | Observational Study                      | No  | N/A  | Associations of social determinants with chronic medical conditions      | Smoking, alcohol/drug use disorder, obesity, hypertension, diabetes, asthma, depression | N/A                  | Associations between social needs and specific chronic conditions using social needs screening and clinical data from Electronic Health Records                   | Standard (ICD-10)                                                            | No  |
| 383 | 33622817 | Association of Covid-19 with Race and Socioeconomic Factors in Family Medicine                                                                                                            | Retrospective Study                      | Yes | Race | Patients referred for SARS CoV-2 testing                                 | COVID-19                                                                                | N/A                  | Odds Ratio, Area Deprivation Index                                                                                                                                | Standard (EPIC + CRISP)                                                      | No  |
| 401 | 36279173 | Medication Adherence and Cardiometabolic Control Indicators among American Indian Adults Receiving Tribal Health Services: Protocol for a Longitudinal Electronic Health Records Study    | Observational longitudinal study         | No  | N/A  | Cardiometabolic control in American-Indian adults with Type 2 Diabetes   | Type 2 Diabetes                                                                         | Medication adherence | bivariate relationship between medication adherence and cardiometabolic control indicators, patient demographics and comorbidities                                | Standard (ICD-10)                                                            | Yes |

|     |          |                                                                                                                                                                |                                        |     |                       |                                                                              |                                         |               |                                                                                                                                                                                             |                                                                                                                                                                                                                        |     |
|-----|----------|----------------------------------------------------------------------------------------------------------------------------------------------------------------|----------------------------------------|-----|-----------------------|------------------------------------------------------------------------------|-----------------------------------------|---------------|---------------------------------------------------------------------------------------------------------------------------------------------------------------------------------------------|------------------------------------------------------------------------------------------------------------------------------------------------------------------------------------------------------------------------|-----|
| 403 | 35484624 | Prospective Evaluation of Social Risks, Physical Function, and Cognitive Function in Prediction of Non-Elective Rehospitalization and Post-Discharge Mortality | Prospective cohort study               | No  | N/A                   | Non-elective rehospitalization and post-discharge mortality                  | Not specified                           | N/A           | Prediction of non-elective rehospitalization and post-discharge mortality using SDOH and other variables                                                                                    | Custom (Transitions Support Level)                                                                                                                                                                                     | Yes |
| 407 | 31745856 | Social Determinants and Military Veterans' Suicide Ideation and Attempt: A Cross-Sectional Analysis of Electronic Health Record Data                           | Retrospective cross-sectional study    | No  | N/A                   | Suicide Ideation and Attempt                                                 | Not specified                           | N/A           | Association between suicide ideation/attempt and SDOH                                                                                                                                       | Standard (ICD-10) and VA-specific (VHA's Suicide Prevention Applications)                                                                                                                                              | No  |
| 408 | 33428455 | Empiric Evidence of Ethnic Disparities in Coronavirus Positivity in Washington State                                                                           | Observational cohort study             | No  | N/A                   | Coronavirus positivity and hospitalization                                   | Coronavirus infections                  | N/A           | Association between ethnicity and outcomes of coronavirus positivity and hospitalization                                                                                                    | Standard (ICD-10, American Community Survey)                                                                                                                                                                           | No  |
| 409 | 32851616 | Toward Understanding the Value of Missing Social Determinants of Health Data in Care Transition Planning                                                       | Retrospective cross-sectional study    | No  | -                     | 30-day revisit                                                               | Not specified                           | Not specified | IV: Activities of daily living (ADL), Abuse, Alcohol, Employment/School, Exercise, Home environment, Nutrition, Sexual, Substance abuse, Tobacco; CV: deprivation index, DV: 30-day revisit | Not specified, assuming standard (the Cerner EHR at the University of Alabama at Birmingham Medical Center (UABMC))                                                                                                    | Yes |
| 410 | 32150271 | Association of Neighborhood Measures of Social Determinants of Health with Breast, Cervical, and Colorectal Cancer Screening Rates in the Us Midwest           | Retrospective cross-sectional study    | No  | N/A                   | Breast, Cervical, and Colorectal Cancer Screening Rates                      | Breast, Cervical, and Colorectal Cancer | N/A           | Association between SDOH and screening for breast, cervical, and colorectal cancer                                                                                                          | Standard (ICD-10, US Census)                                                                                                                                                                                           | No  |
| 416 | 34948748 | Differences in Covid-19 Risk by Race and County-Level Social Determinants of Health among Veterans                                                             | Retrospective Study                    | Yes | Race, income /housing | Covid-19 Risk                                                                | Covid-19                                | N/A           | association between county-level SDOH and COVID-19                                                                                                                                          | Standard (VA EHR)                                                                                                                                                                                                      | No  |
| 419 | 36166652 | Understanding Racial Disparities in Covid-19-Related Complications: Protocol for a Mixed Methods Study                                                         | Mixed Methods (Retrospective + Survey) | Yes | Race                  | racial disparities in severe COVID-19                                        | Covid-19                                | N/A           | dramatic disparity in COVID-19 severity (ie, hospitalization, mortality)                                                                                                                    | Standard (Kaiser EMR)                                                                                                                                                                                                  | No  |
| 424 | 34820853 | Your Neighborhood Matters: A Machine-Learning Approach to the Geospatial and Social Determinants of Health in 9-1-1 Activated Chest Pain                       | Retrospective Observational Study      | No  | N/A                   | Calling 9-1-1 for acute chest pain                                           | Acute Coronary Syndrome (ACS)           | N/A           | Associations between the geospatial and social determinants of health                                                                                                                       | Standard (American Heart Association definition for ACS)                                                                                                                                                               | No  |
| 426 | 32584879 | Assessing the Impact of Social Determinants of Health on Predictive Models for Potentially Avoidable 30-Day Readmission or Death                               | Retrospective cohort study             | No  | N/A                   | Potentially avoidable 30-day readmission or death after a hospital admission | Not specified                           | N/A           | Association between SDOH and potentially avoidable hospital readmission or death 30 days after a hospital admission                                                                         | Custom (American Community Survey, Center for Disease Control and Prevention, United States Department of Agriculture, United States Environmental Protection Agency, the FACETS dataset, and New York City Open Data) | Yes |

|     |          |                                                                                                                                                                                                                          |                                     |           |                                    |                                                                     |                        |                                              |                                                                                                                            |                                                                                                                                                                                                                                                                                                                                                                       |     |
|-----|----------|--------------------------------------------------------------------------------------------------------------------------------------------------------------------------------------------------------------------------|-------------------------------------|-----------|------------------------------------|---------------------------------------------------------------------|------------------------|----------------------------------------------|----------------------------------------------------------------------------------------------------------------------------|-----------------------------------------------------------------------------------------------------------------------------------------------------------------------------------------------------------------------------------------------------------------------------------------------------------------------------------------------------------------------|-----|
| 429 | 32598228 | Assessing the Impact of Social Needs and Social Determinants of Health on Health Care Utilization: Using Patient- and Community-Level Data                                                                               | Retrospective cross-sectional study | No        | -                                  | Healthcare utilization                                              | Not specified          | Not specified                                | IV: Housing issues, Area Deprivation; DV: Healthcare utilization                                                           | Standard (Area Deprivation Index (from ACS 5-Year Estimates in 2017)) and Custom (Hospital utilization(the number of encounters with the health care system); Housing issues (homelessness, housing instability, and structural challenges associated with patients' residence (eg, characteristics of a building such as existing lead paint or structural damage))) | Yes |
| 430 | 35396996 | Assessing Socioeconomic Bias in Machine Learning Algorithms in Health Care: A Case Study of the Houses Index                                                                                                             | Cross-Sectional Study               | No        | N/A                                | Algorithmic bias for pediatric asthmatics                           | Asthma                 | N/A                                          | Association between data quality of electronic health records (EHRs) and low socioeconomic status (SES)                    | Standard (Predetermined Asthma Criteria (PAC))                                                                                                                                                                                                                                                                                                                        | Yes |
| 439 | 35570956 | Analyzing Relationships between Economic and Neighborhood-Related Social Determinants of Health and Intensive Care Unit Length of Stay for Critically Ill Children with Medical Complexity Presenting with Severe Sepsis | Retrospective Observational Study   | No        | N/A                                | Admission to the pediatric critical care complex with severe sepsis | Severe sepsis          | N/A                                          | Association between PICU (Pediatric Intensive Care Unit) length of stay and socioeconomic and neighborhood related factors | A severe sepsis algorithm (29) incorporated into an existing electronic medical record (EMR), Cerner® Powerchart                                                                                                                                                                                                                                                      | No  |
| 447 | 29492953 | Food Insecurity in Older Adults in an Integrated Health Care System                                                                                                                                                      | Retrospective cohort study          | Possibly? | Examined bias in survey completion | Not specified (members of Kaiser Permanente Colorado)               | Not specified          | N/A                                          | IV: Sociodemographic, Health Status, Quality of Life, Functional Abilities, and Social Needs; DV: Food insecurity          | Standard (all IV based on EHR) and custom (food security)                                                                                                                                                                                                                                                                                                             | Yes |
| 449 | 34401723 | Neighborhood Socioeconomic Status, Health Insurance, and Ckd Prevalence: Findings from a Large Health Care System                                                                                                        | Retrospective observational study   | No        | N/A                                | CKD prevalence                                                      | Chronic Kidney Disease | N/A                                          | Association between SDOH / individual-level health insurance status and CKD prevalence                                     | Standard (American Community Survey)                                                                                                                                                                                                                                                                                                                                  | No  |
| 458 | 33168270 | Role of Health Insurance and Neighborhood-Level Social Deprivation on Hypertension Control Following the Affordable Care Act Health Insurance Opportunities                                                              | Longitudinal observational study    | No        | N/A                                | Affordable Care Act (ACA) Medicaid expansion                        | Hypertension           | Affordable Care Act (ACA) Medicaid expansion | gaining health insurance, neighborhood-level social deprivation, hypertension control                                      | Standard (social deprivation: Social Deprivation Index (SDI) by American Community Survey; hypertension: blood pressure) and custom (newly insured/continuously insured/discontinuously uninsured/continuously uninsured)                                                                                                                                             | Yes |

|     |          |                                                                                                                                                                                         |                                                                                   |     |                                        |                                                                               |                                                                                                                                         |     |                                                                                                                                                                                                                                                                                                                                                                       |                                                                                                                       |     |
|-----|----------|-----------------------------------------------------------------------------------------------------------------------------------------------------------------------------------------|-----------------------------------------------------------------------------------|-----|----------------------------------------|-------------------------------------------------------------------------------|-----------------------------------------------------------------------------------------------------------------------------------------|-----|-----------------------------------------------------------------------------------------------------------------------------------------------------------------------------------------------------------------------------------------------------------------------------------------------------------------------------------------------------------------------|-----------------------------------------------------------------------------------------------------------------------|-----|
| 463 | 31445257 | Prediction of Emergency Department Revisits Using Area-Level Social Determinants of Health Measures and Health Information Exchange Information                                         | Retrospective cross-sectional study                                               | No  | N/A                                    | Emergency department revisits                                                 | Not specified                                                                                                                           | N/A | IV: characteristic, health record, SDoH (including socioeconomic, material, substance-related behaviors, environmental, health service, social contexts)                                                                                                                                                                                                              | Standard (EHR and Census) and Custom (Emergency department revisits: revisit only within 30days)                      | Yes |
| 469 | 33006568 | Investigation of Cardiovascular Health and Risk Factors among the Diverse and Contemporary Population in London (the Together Study): Protocol for Linking Longitudinal Medical Records | cross-sectional observational study unfolding into prospective longitudinal study | No  | N/A                                    | Cardiovascular health and risk factors                                        | Cardiovascular diseases                                                                                                                 | N/A | cardiovascular disease incidence and mortality                                                                                                                                                                                                                                                                                                                        | Standard (NHS)                                                                                                        | Yes |
| 470 | 35612181 | Covid-19 Positivity Differences among Patients of a Rural, Southern Us State Hospital System Based on Population Density, Rural-Urban Classification, and Area Deprivation Index        | Retrospective Study                                                               | Yes | Rural vs Urban, Area Deprivation Index | Covid-19 Positivity                                                           | Covid-19                                                                                                                                | N/A | SDOH and rural/urban classification and area deprivation index (ADI)                                                                                                                                                                                                                                                                                                  | Standard                                                                                                              | No  |
| 476 | 29421603 | Associations of Neighborhood-Level Racial Residential Segregation with Adverse Pregnancy Outcomes                                                                                       | Retrospective observational study                                                 | No  | N/A                                    | The rate of adverse pregnancy outcomes                                        | Adverse pregnancy outcomes (preterm birth, spontaneous preterm birth, medically indicated preterm birth, and small for gestational age) | N/A | Associations between neighborhood-level racial residential segregation with adverse pregnancy outcomes                                                                                                                                                                                                                                                                | Custom (US Census tracts and Getis-Ord Gi* statistic to measure segregation)                                          | No  |
| 479 | 31134134 | A Social Determinant of Health May Modify Genetic Associations for Blood Pressure: Evidence from a Snp by Education Interaction in an African American Population                       | Retrospective observational study                                                 | No  | N/A                                    | The rate of Systolic Blood Presssure (SBP) and Diastolic Blood Pressure (DBP) | Systolic Blood Presssure (SBP) and Diastolic Blood Pressure (DBP)                                                                       | N/A | Association between SDOH (education level) and a common genetic variant with blood pressure in an African American population                                                                                                                                                                                                                                         | Standard (ICD-9 CM)                                                                                                   | No  |
| 481 | 30003015 | Association of Behavioral Health Factors and Social Determinants of Health with High and Persistently High Healthcare Costs                                                             | Prospective observational study                                                   | No  | N/A                                    | Diagnosis of psychiatric disorders                                            | Psychiatric disorders                                                                                                                   | N/A | IV: health care costs, clinical diagnoses, patient activation and engagement, SDoH (including SES, living situation, legal and conservatorship status; access to mobile or electronic healthcare, neighborhood environment, transportation access); ACEs, IPV, Patient Activation; DV; Psychiatric and behavioral disorder (e.g., depression, anxiety, substance use) | Standard (e.g., psychiatric and behavioral disorders: EHR-based ICD-9 diagnoses; Adverse Childhood Experiences score) | Yes |
| 483 | 32727486 | A Model of Disparities: Risk Factors Associated with Covid-19 Infection                                                                                                                 | Retrospective Study                                                               | No  | N/A                                    | risk of COVID-19 infection                                                    | Covid-19                                                                                                                                | N/A | Odds ratio for all risk factors <sup>1</sup>                                                                                                                                                                                                                                                                                                                          | Standard                                                                                                              | Yes |
| 485 | 30010764 | Racial Residential Segregation and Hypertensive Disorder of Pregnancy among Women in Chicago: Analysis of Electronic Health Record Data                                                 | Retrospective observational study                                                 | No  | N/A                                    | The rate of hypertensive disorder of pregnancy (HDP)                          | Hypertensive disorder of pregnancy (HDP)                                                                                                | N/A | Association between racial segregation and HDP                                                                                                                                                                                                                                                                                                                        | Custom (US Census tracts and Getis-Ord Gi* statistic to measure segregation)                                          | No  |
| 486 | 29382633 | Prediction of Incident Hypertension within the Next Year: Prospective Study Using Statewide Electronic Health Records and Machine Learning                                              | Retrospective and prospective observational study                                 | No  | N/A                                    | Risk prediction of hypertension                                               | Incident essential hypertension                                                                                                         | N/A | 1-year risk prediction model for incident essential hypertension                                                                                                                                                                                                                                                                                                      | Standard (ICD-9)                                                                                                      | Yes |

|     |          |                                                                                                                                                                      |                                     |    |     |                                                                                                                 |                                                                 |                      |                                                                                                                                                                                             |                                                                                                                                                                                                                                                         |                         |
|-----|----------|----------------------------------------------------------------------------------------------------------------------------------------------------------------------|-------------------------------------|----|-----|-----------------------------------------------------------------------------------------------------------------|-----------------------------------------------------------------|----------------------|---------------------------------------------------------------------------------------------------------------------------------------------------------------------------------------------|---------------------------------------------------------------------------------------------------------------------------------------------------------------------------------------------------------------------------------------------------------|-------------------------|
| 487 | 30646172 | Value of Neighborhood Socioeconomic Status in Predicting Risk of Outcomes in Studies That Use Electronic Health Record Data                                          | Cohort study                        | No | N/A | Use of health care services (emergency department and inpatient and outpatient encounters) and hospitalizations | Accidents, asthma, influenza, myocardial infarction, and stroke | N/A                  | IV: clinical data (demographics, comorbidities, laboratory tests, medications, and use of health care services), Neighborhood Socioeconomic Status; DV: Utilization of healthcare           | Standard (Neighborhood socioeconomic status: Agency for Healthcare Research and Quality (AHRQ) SES index) and custom (Utilization of healthcare: use of services including emergency department, inpatient and outpatient encounters, hospitalizations) | Yes                     |
| 491 | 29574461 | Police-Recorded Crime and Disparities in Obesity and Blood Pressure Status in Chicago                                                                                | Retrospective cross-sectional study | No | N/A | The rate of obesity and elevated blood pressure                                                                 | Obesity and elevated blood pressure (BP)                        | N/A                  | Associations between several types of police-recorded crime (violent, nonviolent, and homicide) and cardiometabolic health (obesity and elevated blood pressure [BP])                       | Custom (City of Chicago Police Data Portal)                                                                                                                                                                                                             | No                      |
| 492 | 30763292 | Clinical and Sociobehavioral Prediction Model of 30-Day Hospital Readmissions among People with HIV and Substance Use Disorder: Beyond Electronic Health Record Data | Randomized controlled trial         | No | N/A | 30-day readmission                                                                                              | HIV-positive substance users                                    | financial incentives | IV: demographic; socioeconomic variables (i.e., income, housing, employment, education, prior incarceration, violence social support); substance use, health record; DV: 30-day readmission | Standard (i.e., Addiction Severity Index, HIV dementia scale.)                                                                                                                                                                                          | Yes                     |
| 493 | 36935292 | The Importance of Social Risk Factors for Patients Diagnosed with Opioid Use Disorder                                                                                | Retrospective cohort study          | No | N/A | Diagnosed Opioid use disorder AND prescribed relevant medication                                                | Opioid Use Disorder                                             | N/A                  | IV: demographic, health record, SDOH (i.e., Food insecurity, housing, social connection, transportation)                                                                                    | Standard (demographic, health record, objective neighborhood information) and Custom (subjective social environment information)                                                                                                                        | Yes                     |
| 495 | 31202286 | Influence of Social Determinants of Health and Substance Use Characteristics on Persons Who Use Drugs Pursuit of Care for Hepatitis C Virus Infection                | Retrospective observational study   | No | N/A | The likelihood to pursue HCV management                                                                         | Substance use, hepatitis C virus, opioid use disorder (OUD)     | N/A                  | Associations between SDOH and linkage-to-care for HCV                                                                                                                                       | Custom (New York State Office of Alcohol and Substance Abuse Services questionnaire)                                                                                                                                                                    | No                      |
| 496 | 34496419 | Telemedicine Adoption During the Covid-19 Pandemic: Gaps and Inequalities                                                                                            | Retrospective Study                 | No | N/A | usage of telemedicine services                                                                                  | Not Specified                                                   | N/A                  | correlation of SDOH with telemedicine services                                                                                                                                              | Custom (EHR + Census Data)                                                                                                                                                                                                                              | Yes (Linear Regression) |
| 509 | 36901047 | Impact of Contextual-Level Social Determinants of Health on Newer Antidiabetic Drug Adoption in Patients with Type 2 Diabetes                                        | Retrospective cohort study          | No | N/A | Antidiabetic Drug Adoption in Patients with Type 2 Diabetes                                                     | Type 2 Diabetes                                                 | N/A                  | Association between SDOH and newer antidiabetic drug adoption                                                                                                                               | Custom (USDA Food Access Research Atlas, National Walkability Index etc.)                                                                                                                                                                               | No                      |
| 510 | 34328797 | Racial Differences in Patient Portal Activation and Research Enrollment among Patients with Prostate Cancer                                                          | Observational Study                 | No | N/A | Patient portal activation and research participation among patients with prostate cancer                        | Prostate cancer                                                 | N/A                  | Association between patient portal activation-research enrollment and social determinants                                                                                                   | Standard (ICD-10)                                                                                                                                                                                                                                       | No                      |

|     |          |                                                                                                                                                                                                    |                                                 |    |     |                                                                                                                                   |                                                                                                |               |                                                                                                                                                              |                                                                                                        |    |
|-----|----------|----------------------------------------------------------------------------------------------------------------------------------------------------------------------------------------------------|-------------------------------------------------|----|-----|-----------------------------------------------------------------------------------------------------------------------------------|------------------------------------------------------------------------------------------------|---------------|--------------------------------------------------------------------------------------------------------------------------------------------------------------|--------------------------------------------------------------------------------------------------------|----|
| 511 | 32878515 | Change of Address as a Measure of Housing Insecurity Predicting Rural Emergency Department Revisits after Asthma Exacerbation                                                                      | Restrospective obserational study               | No | N/A | Emergency department revisits following asthma exacerbation                                                                       | Asthma                                                                                         | Not specified | Multivariate logistic regression with odds ratios and confidence intervals for association between address change and ED revisits                            | Standard                                                                                               | No |
| 513 | 33022319 | Adverse Social Factors and All-Cause Mortality among Male and Female Patients Receiving Care in the Veterans Health Administration                                                                 | Retrospective observational study               | No | N/A | Mortality (death)                                                                                                                 | Not specified                                                                                  | N/A           | Association between SDOH and all-cause mortality in the Veterans Health Administration                                                                       | Custom (ICD-10 and VHA-specific classifications such as housing instability or military sexual trauma) | No |
| 517 | 36208711 | Race and Socioeconomic Status Are Associated with Inferior Patient-Reported Outcome Measures Following Rotator Cuff Repair                                                                         | Retrospective cohort study                      | No | N/A | Patient-reported outcome measures following rotator cuff repair                                                                   | Rotator Cuff Repair                                                                            | N/A           | Association between inferior patient-reported outcome measures following rotator cuff repair                                                                 | Standard (PROMIS, US Census)                                                                           | No |
| 518 | 34261446 | Evaluating the Association of Social Needs Assessment Data with Cardiometabolic Health Status in a Federally Qualified Community Health Center Patient Population                                  | Observational cross-sectional study             | No | N/A | Cardiometabolic health status                                                                                                     | cardiometabolic diseases such as obesity, hypertension, atherosclerotic cardiovascular disease | Not specified | Stepwise and LASSO regression examining relationship between social needs screening responses and cardiometabolic health                                     | Custom (EHR and Protocol for Responding to and Assessing Patients' Assets, Risks and Experiences)      | No |
| 521 | 36630557 | Impacts of Individual Patient Language and Neighborhood Ethnic Enclave on Covid-19 Test Positivity among Hispanic/Latinx Patients in San Francisco                                                 | Retrospective Study                             | No | N/A | COVID-19 positivity                                                                                                               | Covid-19                                                                                       | Not specified | odds ratio (patients living in the highest versus lowest Hispanic/Latinx enclave)                                                                            | Standard                                                                                               | No |
| 526 | 36931038 | Erasing Inequality: Examining Discrepancies between Electronic Health Records and Patient Narratives to Uncover Perceived Stigma and Dismissal in Clinical Encounters                              | Qualitative and semi-structural interview study | No | N/A | Not specified                                                                                                                     | Not specified                                                                                  | Not specified | Perceived stigma, its interactions with the health system, patients' feeling toward conflict between clinicians and patients understanding                   | Not specified                                                                                          | No |
| 532 | 26944212 | Differences in Access to and Preferences for Using Patient Portals and Other Ehealth Technologies Based on Race, Ethnicity, and Age: A Database and Survey Study of Seniors in a Large Health Plan | Retrospective Study                             | No | N/A | N/A                                                                                                                               | N/A                                                                                            | Not specified | No                                                                                                                                                           | N/A                                                                                                    | No |
| 533 | 31862438 | Neighborhood Disadvantage and Lung Cancer Incidence in Ever-Smokers at a Safety Net Health-Care System: A Retrospective Study                                                                      | Retrospective Study                             | No | N/A | lung cancer incidence in ever-smokers                                                                                             | lung cancer                                                                                    | Not specified | multivariate Cox-proportional hazard model                                                                                                                   | Standard                                                                                               | No |
| 538 | 34053276 | Social Determinants of Health in Total Knee Arthroplasty : Are Social Factors Associated with Increased 30-Day Post-Discharge Cost of Care and Length of Stay?                                     | Retrospective Study                             | No | N/A | the need for total knee arthroplasty30-day length of stay (LOS) and total cost of care (TCOC) after total knee arthroplasty (TKA) | total knee arthroplasty                                                                        | Not specified | multiple regression analyses                                                                                                                                 | standard                                                                                               | No |
| 548 | 28093689 | Characterizing a "Big Data" Cohort of over 200,000 Low-Income U.S. Infants and Children for Obesity Research: The Advance Early Life Cohort                                                        | Retrospective Study                             | No | N/A | early life obesity                                                                                                                | obesity                                                                                        | Not specified | descriptive analysis focusing on the availability of BMI measures, sociodemographic characteristics, weight status, and longitudinal follow-up of the cohort | Standard                                                                                               | No |

|     |          |                                                                                                                                                                                           |                                    |    |     |                                                                                                       |                                            |               |                                                                                                                                                                                                                                         |                                                                                                                                |     |
|-----|----------|-------------------------------------------------------------------------------------------------------------------------------------------------------------------------------------------|------------------------------------|----|-----|-------------------------------------------------------------------------------------------------------|--------------------------------------------|---------------|-----------------------------------------------------------------------------------------------------------------------------------------------------------------------------------------------------------------------------------------|--------------------------------------------------------------------------------------------------------------------------------|-----|
| 549 | 37070611 | Improving Outcomes of Pediatric Lupus Care Delivery with Provider Goal Setting Activities and Multidisciplinary Care Models                                                               | Retrospective Study                | No | N/A | care quality and its association with prednisone use in youth with systemic lupus erythematosus (SLE) | Systemic Lupus Erythematosus (SLE)         | Not specified | Pediatric Lupus Care Index (pLCI) performance, associations between pLCI and subsequent prednisone use                                                                                                                                  | Custom ( pediatric Lupus Care Index (pLCI))                                                                                    | No  |
| 550 | 31704758 | The Association between Neighborhood Socioeconomic and Housing Characteristics with Hospitalization: Results of a National Study of Veterans                                              | Observational cohort study         | No | N/A | Hospitalization rates                                                                                 | Not specified                              | Not specified | generalized estimating equation                                                                                                                                                                                                         | Custom (defined hospitalization based on specific criteria within the VHA system)                                              | No  |
| 558 | 33147232 | Racial-Ethnic Differences in Prevalence of Social Determinants of Health and Social Risks among Middle-Aged and Older Adults in a Northern California Health Plan                         | Retrospective Study                | No | N/A | N/A                                                                                                   | N/A                                        | Not specified | age-sex standardized estimates, multivariable logistic regression                                                                                                                                                                       | Custom                                                                                                                         | No  |
| 562 | 36739248 | The Bari-Hoods Project: Neighborhood Social Determinants of Health and Postoperative Weight Loss Using Integrated Electronic Health Record, Census, and County Data                       | Observational study                | No | N/A | Weight loss following bariatric surgery.                                                              | Obesity                                    | Not specified | percent total weight lost (%TWL)                                                                                                                                                                                                        | Custom (Integration of EHR, census, and county data for specific variables related to weight loss following bariatric surgery) | No  |
| 564 | 35940570 | Geographic Variation in Acute Pediatric Mental Health Utilization                                                                                                                         | retrospective study                | No | N/A | Admission for a mental health diagnosis or symptoms                                                   | Mental health issues in pediatric patients | Not specified | Normalized visit rates                                                                                                                                                                                                                  | Custom (EHR and Community survey data)                                                                                         | No  |
| 565 | 29042345 | The Association of Patient Factors, Digital Access, and Online Behavior on Sustained Patient Portal Use: A Prospective Cohort of Enrolled Users                                           | Prospective cohort study           | No | N/A | N/A                                                                                                   | N/A                                        | Not specified | the frequency of portal log-ins                                                                                                                                                                                                         | Custom                                                                                                                         | No  |
| 571 | 34009238 | Association of Socioeconomic Disadvantage with Long-Term Mortality after Myocardial Infarction: The Mass General Brigham Young-Mi Registry                                                | Retrospective cohort study         | No | N/A | Myocardial infarction (MI) experienced by patients at or before 50 years of age                       | Myocardial Infarction (MI)                 | Not specified | all-cause and cardiovascular mortality                                                                                                                                                                                                  | Custom                                                                                                                         | No  |
| 572 | 31367515 | Identifying Neighborhood Characteristics Associated with Diabetes and Hypertension Control in an Urban African-American Population Using Geo-Linked Electronic Health Records             | Retrospective cohort study         | No | N/A | diabetes and hypertension control                                                                     | diabetes and hypertension                  | Not specified | poor diabetes control (defined as hemoglobin A1c > 9% or no record of a HbA1c test in the previous year) and poor hypertension control (defined as systolic blood pressure $\geq$ 140 mmHg or diastolic blood pressure $\geq$ 90 mmHg). | standard(Health Resources and Services Administration (HRSA) Uniform Data System (UDS) reporting)                              | No  |
| 577 | 31414132 | Association of Rising Violent Crime with Blood Pressure and Cardiovascular Risk: Longitudinal Evidence from Chicago, 2014-2016                                                            | Retrospective cohort study         | No | N/A | association between rising violent crime and elevated blood pressure (BP)                             | hypertension                               | Not specified | elevated blood pressure (BP)                                                                                                                                                                                                            | Standard                                                                                                                       | Yes |
| 579 | 29143960 | Predicting Frequent Emergency Department Use among Children with Epilepsy: A Retrospective Cohort Study Using Electronic Health Data from 2 Centers                                       | Retrospective cohort study         | No | N/A | use of the emergency department (ED) among children with epilepsy                                     | epilepsy                                   | Not specified | frequency of emergency department usage.                                                                                                                                                                                                | Standard                                                                                                                       | Yes |
| 587 | 27742630 | Predicting Frequent Hospital Admission Risk in Singapore: A Retrospective Cohort Study to Investigate the Impact of Comorbidities, Acute Illness Burden and Social Determinants of Health | Observational, retrospective study | No | N/A | frequent hospital admissions                                                                          | Not specified                              | Not specified | frequent hospital admissions, evaluated using the Area Under the Receiver Operating Characteristic Curve (AUC)                                                                                                                          | Standard                                                                                                                       | Yes |

|     |          |                                                                                                                                                                       |                            |     |              |                                                                                                                             |                                                               |               |                                                                                                                                                                       |          |    |
|-----|----------|-----------------------------------------------------------------------------------------------------------------------------------------------------------------------|----------------------------|-----|--------------|-----------------------------------------------------------------------------------------------------------------------------|---------------------------------------------------------------|---------------|-----------------------------------------------------------------------------------------------------------------------------------------------------------------------|----------|----|
| 592 | 32160902 | Epigenetic Predictors of All-Cause Mortality Are Associated with Objective Measures of Neighborhood Disadvantage in an Urban Population                               | prospective cohort study   | No  | N/A          | association between neighborhood characteristics and epigenetic biomarkers of mortality risk                                | Not specified                                                 | Not specified | epigenetic mortality risk score (eMRS)                                                                                                                                | Standard | No |
| 601 | 36877520 | Association of Education with Dementia Incidence Stratified by Ethnicity and Nativity in a Cohort of Older Asian American Individuals                                 | Retrospective study        | Yes | Not specific | incident dementia diagnosis in the EHR                                                                                      | dementia                                                      | Not specified | dementia incidence rates                                                                                                                                              | Standard | No |
| 610 | 34348475 | Rheumatic Heart Disease in the United States: Forgotten but Not Gone: Results of a 10 Year Multicenter Review                                                         | retrospective study        | No  | N/A          | children living with acute rheumatic fever (ARF) and rheumatic heart disease (RHD)                                          | Acute Rheumatic Fever (ARF) and Rheumatic Heart Disease (RHD) | Not specified | regression analysis to investigate the relationships between community deprivation and outcomes                                                                       | Standard | No |
| 613 | 36964218 | Obesity in Pediatric Congenital Heart Disease: The Role of Age, Complexity, and Sociodemographics                                                                     | retrospective cohort study | No  | N/A          | children with and without congenital heart disease (CHD)                                                                    | congenital heart disease (CHD) and obesity                    | Not specified | logistic regression analysis to compare the odds of obesity between children with CHD and a control population of non-CHD patients                                    | standard | No |
| 620 | 30030110 | Neighbourhood Socioeconomic Disadvantage, Risk Factors, and Diabetes from Childhood to Middle Age in the Young Finns Study: A Cohort Study                            | retrospective cohort study | No  | N/A          | diabetes and cardiometabolic risk factors                                                                                   | obesity, hypertension, fatty liver, and diabetes              | Not specified | Logistic and linear regression analyses were used to assess factors                                                                                                   | standard | No |
| 636 | 36375010 | Parental Childhood Adversity and Pediatric Emergency Department Utilization: A Pilot Study                                                                            | cross-sectional survey     | No  | N/A          | pediatric emergency department (PED) utilization                                                                            | Not specified                                                 | Not specified | Pearson correlation to analyze the relationship between parental adverse childhood experiences (ACEs), resilience, social determinants of health, and PED utilization | standard | No |
| 639 | 36038962 | Neighborhood Deprivation and Severe Maternal Morbidity in a Medicaid-Insured Population in Georgia                                                                    | retrospective study        | No  | N/A          | severe maternal morbidity (SMM) among individuals in a public health system in Atlanta, Georgia                             | severe maternal morbidity (SMM)                               | Not specified | log-binomial regression with generalized estimating equations to estimate relative risks (aRR) for the association between neighborhood deprivation and SMM           | standard | No |
| 640 | 29569327 | Reducing Emergency Room Visits and in-Hospitalizations by Implementing Best Practice for Transitional Care Using Innovative Technology and Big Data                   | retrospective study        | No  | N/A          | reducing unnecessary hospitalizations in a Medicaid population by identifying and acting upon social determinants of health | Not specified                                                 | Not specified | use negative binomial regression to compare utilization before and during the intervention                                                                            | Standard | No |
| 648 | 36958532 | Social Needs as a Risk Factor for Positive Postpartum Depression Screens in Pediatric Primary Care                                                                    | retrospective cohort study | No  | N/A          | the association between self-reported social needs and postpartum depression (PPD) symptoms in mothers                      | postpartum depression (PPD)                                   | Not specified | logistic regression                                                                                                                                                   | Standard | No |
| 649 | 36287625 | Predictors of Completion of Clinically Necessary Radiologist-Recommended Follow-up Imaging: Assessment Using an Automated Closed-Loop Communication and Tracking Tool | retrospective study        | No  | N/A          | the completion of clinically necessary follow-up imaging in patients with adverse social determinants of health             | Not specified                                                 | Not specified | Multivariable logistic regression analysis                                                                                                                            | Standard | No |



|     |          |                                                                                                                             |                            |     |                               |                                                                                                                                                                             |                                                                                   |               |                                                                                                                                                                                              |                     |    |
|-----|----------|-----------------------------------------------------------------------------------------------------------------------------|----------------------------|-----|-------------------------------|-----------------------------------------------------------------------------------------------------------------------------------------------------------------------------|-----------------------------------------------------------------------------------|---------------|----------------------------------------------------------------------------------------------------------------------------------------------------------------------------------------------|---------------------|----|
| 651 | 34709424 | Exercise Facilities and the Prevalence of Obesity and Type 2 Diabetes in the City of Madrid                                 | retrospective cohort study | No  | N/A                           | the association between the availability of exercise facilities and the likelihood of obesity and type 2 diabetes in the adult                                              | obesity and type 2 diabetes                                                       | Not specified | Poisson regression models with robust standard errors clustered                                                                                                                              | standard            | No |
| 653 | 36683912 | Associating Social Determinants of Health with Promis Cat Scores and Health Care Utilization after Acl Reconstruction       | retrospective cohort study | No  | N/A                           | the outcomes of anterior cruciate ligament reconstruction (ACLR) surgery                                                                                                    | anterior cruciate ligament reconstruction                                         | Not specified | the PROMIS computer adaptive test (CAT) scores                                                                                                                                               | standard            | No |
| 655 | 35184126 | Socioeconomic Correlates of Keratoconus Severity and Progression                                                            | retrospective cohort study | No  | N/A                           | keratoconus                                                                                                                                                                 | keratoconus                                                                       | Not specified | employed logistic regression to evaluate factors associated with severity at presentation and corneal transplantation, and Cox proportional hazards modeling to evaluate disease progression | standard            | No |
| 657 | 35813187 | Prevalence of Social and Economic Stressors among Transgender Veterans with Alcohol and Other Drug Use Disorders            | retrospective study        | Yes | social and economic stressors | the prevalence of social and economic stressors among transgender and cisgender VA outpatients, particularly in the context of alcohol and drug use disorders (AUD and DUD) | Alcohol Use Disorder (AUD) and Drug Use Disorder (DUD)                            | Not specified | Minority Stress Model                                                                                                                                                                        | standard            | No |
| 659 | 35455496 | Family Stressors and Resources as Social Determinants of Health among Caregivers and Young Children                         | cross-sectional study      | No  | N/A                           | various health outcomes related to caregiver and child health, specifically caregiver depressive symptoms, anxiety symptoms, and sleep problems                             | Not specified                                                                     | Not specified | Cumulative Stressor Inventory and Cumulative Resources Inventory                                                                                                                             | standard and custom | No |
| 661 | 32367203 | Geospatial Variations and Neighborhood Deprivation in Drug-Related Admissions and Overdoses                                 | retrospective cohort study | No  | N/A                           | Spatial heterogeneity in patients admitted for opioid, amphetamine, and psychostimulant-related diagnoses and overdoses                                                     | drug use, specifically opioid, amphetamine, and psychostimulant use and overdoses | Not specified | geospatial clustering of substance use-related admissions and overdoses                                                                                                                      | standard            | No |
| 665 | 36389291 | The Impact of Substance Use on Health Care Utilization, Treatment, and Outcomes in Patients with Non-Small Cell Lung Cancer |                            | No  | N/A                           | the impact of substance use on health care utilization, treatment, and outcomes in patients with non-small cell lung cancer (NSCLC)                                         | non-small cell lung cancer (NSCLC)                                                | Not specified | comparative and multivariable analyses to evaluate lung cancer outcomes including survival                                                                                                   | standard            | No |
| 669 | 35947491 | Telehealth to Improve Continuity for Patients Receiving Buprenorphine Treatment for Opioid Use Disorder                     | retrospective review       | No  | N/A                           | continuity of care for patients receiving buprenorphine treatment for opioid use disorder                                                                                   | opioid use disorder                                                               | Not specified | rates of continuity by visit type (in-person or telehealth)                                                                                                                                  | standard            | No |

|     |          |                                                                                                                                         |                            |     |                                     |                                                                                                                                            |                                                 |                                                                                                                            |                                                                                                                                                                                                                                                        |          |     |
|-----|----------|-----------------------------------------------------------------------------------------------------------------------------------------|----------------------------|-----|-------------------------------------|--------------------------------------------------------------------------------------------------------------------------------------------|-------------------------------------------------|----------------------------------------------------------------------------------------------------------------------------|--------------------------------------------------------------------------------------------------------------------------------------------------------------------------------------------------------------------------------------------------------|----------|-----|
| 674 | 34529635 | Longitudinal Trends in Body Mass Index before and During the Covid-19 Pandemic among Persons Aged 2-19 Years - United States, 2018-2020 | observational study        | Yes | selection bias and potential biases | the increase in body mass index (BMI) and the associated rise in obesity rates among children and adolescents during the COVID-19 pandemic | obesity                                         | Not specified                                                                                                              | the rate of BMI increase, obesity prevalence, and changes in these metrics before and during the COVID-19 pandemic                                                                                                                                     | standard | No  |
| 678 | 35493405 | Social Determinants of Human Papillomavirus Vaccine Series Completion among U.S. Adolescents: A Mixed-Methods Study                     | retrospective study        | No  | N/A                                 | the completion of the human papillomavirus (HPV) vaccine series among U.S. adolescents                                                     | HPV-associated cancers                          | Not specified                                                                                                              | multivariable logistic regression analyses to examine the influence of various factors on timely series completion, with significance set at 0.05. Adjusted odds ratios (aORs) and 95% confidence intervals (CIs) were reported to address effect size | standard | No  |
| 681 | 33519165 | The Influence of Health Insurance Stability on Racial/Ethnic Differences in Diabetes Control and Management                             | retrospective study        | No  | N/A                                 | the management and control of type 2 diabetes mellitus                                                                                     | type 2 diabetes mellitus                        | Not specified                                                                                                              | diabetes management measures established by the National Committee for Quality Assurance (NCQA)                                                                                                                                                        | standard | No  |
| 682 | 35211396 | Social Disparities of Pain and Pain Intensity among Women Diagnosed with Early Stage Breast Cancer                                      | retrospective study        | No  | N/A                                 | the occurrence and intensity of pain in women diagnosed with early-stage breast cancer                                                     | breast cancer                                   | Not specified                                                                                                              | zero-inflated Poisson models to analyze pain occurrence and intensity                                                                                                                                                                                  | standard | No  |
| 696 | 32716125 | Household Material Hardships Impact Emergency Department Reliance in Pediatric Patients with Sickle Cell Disease                        | retrospective study        | No  | N/A                                 | Emergency department (ED) utilization in pediatric patients with sickle cell disease (SCD)                                                 | Sickle cell disease (SCD) in pediatric patients | identify modifiable risk factors (household material hardships) for high ED utilization to potentially guide interventions | emergency department reliance (EDr); P-values and R-squared (R <sup>2</sup> ) values                                                                                                                                                                   | Standard | No  |
| 698 | 35342390 | The Impact of Aces on Bmi: An Investigation of the Genotype-Environment Effects of Bmi                                                  | retrospective study        | No  | N/A                                 | the impact of Adverse Childhood Experiences (ACEs) on adult obesity                                                                        | obesity                                         | Not specified                                                                                                              | linear regression, the association between adverse childhood experiences (ACEs) and body mass index (BMI)                                                                                                                                              | Standard | No  |
| 699 | 31811046 | A Statistical-Learning Model for Unplanned 7-Day Readmission in Pediatrics                                                              | retrospective cohort study | No  | N/A                                 | pediatric 7-day unplanned readmissions                                                                                                     | Not specified                                   | Not specified                                                                                                              | LASSO regression assesses multicollinearity based on the area under the curve (AUC)                                                                                                                                                                    | standard | Yes |
| 700 | 37104833 | Food Insecurity, Neighborhood, and Health Care Utilization in Health System Adults                                                      | Retrospectivl study        | No  | N/A                                 | acute health care utilization within 90 days of hospital discharge                                                                         | Not specified                                   | Not specified                                                                                                              | Multivariable negative binomial regression                                                                                                                                                                                                             | Standard | No  |

|     |          |                                                                                                                                                                                      |                                         |     |                 |                                                                                                                                                                |                                                             |               |                                                                                                                                            |          |     |
|-----|----------|--------------------------------------------------------------------------------------------------------------------------------------------------------------------------------------|-----------------------------------------|-----|-----------------|----------------------------------------------------------------------------------------------------------------------------------------------------------------|-------------------------------------------------------------|---------------|--------------------------------------------------------------------------------------------------------------------------------------------|----------|-----|
| 701 | 33004699 | Diabetes Prevalence and Demographics in 25 First Nations Communities in Northwest Ontario (2014-2017)                                                                                | retrospective diabetes prevalence study | No  | N/A             | epidemiology and prevalence of diabetes in the First Nations communities in northwest Ontario, along with cardiovascular comorbidities in the adult population | Diabetes, along with comorbid hypertension and dyslipidemia | Not specified | Diabetes prevalence calculation                                                                                                            | Standard | No  |
| 703 | 35306931 | Racial Disparities in Covid-19 Test Positivity among People Living with Hiv in the United States                                                                                     | retrospective study                     | No  | N/A             | COVID-19 positivity in relation to HIV status and race/ethnicity                                                                                               | COVID-19 and HIV                                            | Not specified | Multivariable logistic regression (odds ratios (aOR) and confidence intervals (CI) )                                                       | standard | No  |
| 711 | 36265163 | Machine Learning Techniques to Explore Clinical Presentations of Covid-19 Severity and to Test the Association with Unhealthy Opioid Use: Retrospective Cross-Sectional Cohort Study | Retrospective cohort study              | No  | N/A             | COVID-19 severity among patients, particularly in relation to unhealthy opioid use (UOU)                                                                       | COVID-19 and Unhealthy Opioid Use (UOU)                     | Not specified | machine learning techniques and mixed-effects ordinal logistic regression to assess the severity of COVID-19 outcomes in patients with UOU | Standard | No  |
| 712 | 34149017 | Psychosocial Determinants of Readmission after Surgery                                                                                                                               | prospective cohort study                | No  | N/A             | unplanned readmission to any medical facility within 30 days of hospital discharge                                                                             | general, vascular, or thoracic surgery                      | Not specified | unadjusted and adjusted incidence rate ratios (IRRs) calculated using Poisson regression                                                   | Standard | Yes |
| 713 | 36205670 | More Accessible Covid-19 Treatment through Monoclonal Antibody Infusion in the Emergency Department                                                                                  | retrospective review                    | No  | N/A             | monoclonal antibody (MAB) infusion for COVID-19 treatment in an outpatient setting, specifically in the emergency department (ED)                              | COVID-19                                                    | Not specified | chi-squared tests for categorical variables and t-tests for continuous variables to compare two groups of patients receiving MAB infusion  | Standard | No  |
| 714 | 37157005 | Social Determinants of Health and Cdk4/6 Inhibitor Use and Outcomes among Patients with Metastatic Breast Cancer                                                                     | retrospective study                     | Yes | systematic bias | the use and outcomes of CDK4/6 inhibitors (CDK4/6i) in patients with hormone receptor-positive, HER2-negative metastatic breast cancer (MBC)                   | Metastatic breast cancer (MBC)                              | Not specified | chi-square tests; multivariable logistic regression models                                                                                 | standard | No  |
| 715 | 34980656 | Residential Segregation and Emergency Department Utilization among an Underserved Urban Emergency Department Sample in North Carolina                                                | retrospective study                     | No  | N/A             | emergency department (ED) utilization                                                                                                                          | Not specified                                               | Not specified | associations between community context and ED utilization, with interaction terms by race                                                  | standard | No  |
| 719 | 37087897 | Exercise Facility Availability and Incidence of Type 2 Diabetes and Complications in Spain: A Population-Based Retrospective Cohort 2015-2018                                        | retrospective cohort study              | No  | N/A             | the incidence of type 2 diabetes                                                                                                                               | type 2 diabetes                                             | Not specified | risk ratios (Poisson regression models ). Interactions were explored with SES tertiles and by sex.                                         | standard | No  |
| 722 | 28476461 | Adding Social Determinant Data Changes Children's Hospitals' Readmissions Performance                                                                                                | retrospective cohort study              | No  | N/A             | pediatric readmissions                                                                                                                                         | all-condition readmissions in a pediatric hospital setting  | Not specified | the change in hospitals' readmission decile-rank and the assessment of model fit and accuracy                                              | standard | No  |
| 728 | 35211958 | Risk from Delayed or Missed Care and Non-Covid-19 Outcomes for Older Patients with Chronic Conditions During the Pandemic                                                            | retrospective cohort study              | No  | N/A             | COVID-19 pandemic                                                                                                                                              | Chronic illnesses in older patients                         | Not specified | mortality, inpatient events, Medicare payments, and primary care and specialty care visits (both in-person and telehealth)                 | Standard | No  |

|     |          |                                                                                                                               |                                                |    |     |                                                                |                              |                                              |                                                                                                                                                                               |                                                                                                                                                     |     |
|-----|----------|-------------------------------------------------------------------------------------------------------------------------------|------------------------------------------------|----|-----|----------------------------------------------------------------|------------------------------|----------------------------------------------|-------------------------------------------------------------------------------------------------------------------------------------------------------------------------------|-----------------------------------------------------------------------------------------------------------------------------------------------------|-----|
| 730 | 32927325 | Insurance Type and Marital Status Impact Hospital Length of Stay after Pancreatoduodenectomy                                  | Retrospective review of a prospective database | No | N/A | hospital length of stay (LOS) after pancreatoduodenectomy (PD) | pancreatoduodenectomy        | Not specified                                | hospital LOS, insurance types, marital status, and various postoperative outcomes                                                                                             | Standard                                                                                                                                            | No  |
| 731 | 33851193 | Social and Clinical Determinants of Covid-19 Outcomes: Modeling Real-World Data from a Pandemic Epicenter                     | Retrospective cohort study                     | No | N/A | COVID-19 pandemic                                              | COVID-19                     | Not specified                                | hospitalization, severe disease, and death due to COVID-19                                                                                                                    | standard                                                                                                                                            | Yes |
| 734 | 34593712 | Assessing and Augmenting Predictive Models for Hospital Readmissions with Novel Variables in an Urban Safety-Net Population   | Retrospective cohort study                     | No | N/A | Hospital readmissions                                          | Not specified                | Not specified                                | C-statistics and odds ratios for factors associated with readmissions                                                                                                         | standard                                                                                                                                            | yes |
| 739 | 34159548 | Neighborhood Effects on Missed Appointments in a Large Urban Academic Multispecialty Practice                                 | Retrospective cross-sectional study            | No | N/A | Missed appointments                                            | Not specified                | N/A                                          | IV: demographic, patients' census tracts of residence, DV: Missed appointments                                                                                                | Standard (Government, city defined index/score like crime) and custom (survey questions to measure some SDoH, like perceived safety)                | yes |
| 744 | 28477050 | Revealing the Prevalence and Consequences of Food Insecurity in Children with Epilepsy                                        | Retrospective Observational Study              | No | N/A | Acute healthcare utilization (ED visit or hospitalization)     | Epilepsy                     | N/A                                          | Association between FI and healthcare utilization, health-related quality-of-life (HR-QOL), and medication side effect control                                                | Standard (ICD-10)                                                                                                                                   | No  |
| 748 | 36720999 | Influence of Social Deprivation Index on in-Hospital Outcomes of Covid-19                                                     | Retrospective cross-sectional study            | No | N/A | Admission to ED or hospital                                    | COVID-19                     | N/A                                          | IV: Social Deprivation (including income, education, employment, housing, household characteristics and transportation); DV: in-hospital intubation and in-hospital mortality | Standard (Social Deprivation Index)                                                                                                                 | Yes |
| 750 | 34038164 | Prior Frequent Emergency Department Use as a Predictor of Emergency Department Visits after a New Cancer Diagnosis            | Retrospective cohort study                     | No | N/A | Emergency department visits after a new cancer diagnosis       | Cancer                       | N/A                                          | Association between frequent ED use and ED visits after a new cancer diagnosis                                                                                                | Standard                                                                                                                                            | Yes |
| 766 | 34668658 | Community Socioeconomic Deprivation Predicts Nonalcoholic Steatohepatitis                                                     | Retrospective observational study              | No | N/A | Nonalcoholic Steatohepatitis                                   | Nonalcoholic Steatohepatitis | N/A                                          | Association between socioeconomic deprivation and nonalcoholic fatty liver disease (NAFLD)/nonalcoholic steatohepatitis (NASH)                                                | Standard (ACS)                                                                                                                                      | Yes |
| 768 | 34360326 | Psychosocial Determinants of Hiv Stigma among Men Who Have Sex with Men in San Francisco, California                          | Cross-sectional study                          | No | N/A | Not specified                                                  | HIV                          | N/A                                          | IV: demographic, injection history, housing, mental health status, viral load; DV: experienced HIV stigma                                                                     | Standard(IV) and custom(stigma)                                                                                                                     | No  |
| 777 | 35270315 | Let It Beat: How Lifestyle and Psychosocial Factors Affect the Risk of Sudden Cardiac Death-a 10-Year Follow-up Study         | Retro-prospective single-centre study          | No | N/A | Implantable Cardioverter Defibrillator (ICD) intervention      | Sudden cardiac death         | Implantable Cardioverter Defibrillator (ICD) | IV: lifestyle and psychosocial factors; DV: sudden cardiac death risk                                                                                                         | Standard (i.e., health information) and Custom (i.e., psychosocial factors = stress in personal life, stress in working life, and financial stress) | Yes |
| 652 | 36847187 | Utility of a MI Analytics on Real Time Risk Stratification and Re-Intervention Risk Prediction on AV Access Outcomes and Cost | Single center analysis                         | No | N/A | Re-intervention risk prediction on AV access outcomes and cost | AVF and AV graft             | N/A                                          | Real time risk stratification and re-intervention risk prediction on AV access outcomes and cost                                                                              | Custom                                                                                                                                              | Yes |

|     |          |                                                                                                                                                                                                                    |                                     |    |     |                                                                       |                                 |               |                                                                                                                                            |          |     |
|-----|----------|--------------------------------------------------------------------------------------------------------------------------------------------------------------------------------------------------------------------|-------------------------------------|----|-----|-----------------------------------------------------------------------|---------------------------------|---------------|--------------------------------------------------------------------------------------------------------------------------------------------|----------|-----|
| 706 | 30198104 | Development and Future Deployment of a 5 Years Allograft Survival Model for Kidney Transplantation                                                                                                                 | Retrospective cohort study          | No | N/A | Allograft survival after kidney transplantation                       | Kidney transplantation          | Yes           | Five-year allograft survival                                                                                                               | Custom   | Yes |
| 609 | 36214725 | Unmet Needs for Food, Medicine, and Mental Health Services among Vulnerable Older Adults During the Covid-19 Pandemic                                                                                              | Observational cross-sectional study | No | N/A | Unmet needs for food, medicine, and mental health services            | Not specified                   | Not specified | Regression analysis examining relationship between unmet needs for food, medicine and mental health services, and sociodemographic factors | Standard | No  |
| 666 | 33516898 | Pediatric Primary Care-Based Social Needs Services and Health Care Utilization                                                                                                                                     | Retrospective cohort study          | No | N/A | ambulatory, emergency, and inpatient services                         | Not specified                   | Not specified | adjusted incidence rate ratios                                                                                                             | standard | No  |
| 683 | 35342984 | Achieving Diabetes Treatment Targets in People with Registered Mental Illness Is Similar or Improved Compared with Those Without: Analyses of Linked Observational Datasets                                        | Cross-sectional study               | No | N/A | type 2 diabetes mellitus treatment targets                            | Type 2 diabetes mellitus        | Not specified | multivariate logistic regression, odds ratio with confident intervals                                                                      | standard | No  |
| 685 | 36276335 | Using Phenome-Wide Association Studies and the Sf-12 Quality of Life Metric to Identify Profound Consequences of Adverse Childhood Experiences on Adult Mental and Physical Health in a Northern Nevada Population | Cross-sectional study               | No | N/A | Mental and physical health events of adverse childhood experiences    |                                 | Not specified | Phenome-wide association studies, SF-12 quality of life metric.                                                                            | standard |     |
| 720 | 36569128 | Inequalities in Glycemic and Multifactorial Cardiovascular Control of Type 2 Diabetes: The Heart Healthy Hoods Study                                                                                               | Cross-sectional study               | No | N/A | Glycemic and multifactorial cardiovascular control in Type 2 Diabetes | type 2 diabetes                 | Not specified | Factors associated with glycemic control using multilevel logistic regression                                                              | standard | No  |
| 737 | 35360124 | Contributions of Covid-19 Pandemic-Related Stressors to Racial and Ethnic Disparities in Mental Health During Pregnancy                                                                                            | Cross-sectional study               | No | N/A | Mental health during pregnancy in Covid-19 pandemic                   | prenatal depression and anxiety | Not specified | Adjusted prevalence ratio for prenatal depression and anxiety among different racial and ethnic groups                                     | standard | No  |
| 762 | 36931379 | Heat-Related First Cardiovascular Event Incidence in the City of Madrid (Spain): Vulnerability Assessment by Demographic, Socioeconomic, and Health Indicators                                                     | Retrospective Observational study   | No | N/A | acute cardiovascular events                                           | cardiovascular diseases         | Not specified | odds ratio association between heat and the incidence of first acute cardiovascular events                                                 | standard | No  |

| EndNote_I | PubMed_I | Title                                                                                                                                                                                                                          | Types of Intervention                                                                   | Intervention level                                                            | Family/Social support?                                      | what type of health outcomes                                                                                                              | Intervention effectiveness                                                                                                             | Generalizability |
|-----------|----------|--------------------------------------------------------------------------------------------------------------------------------------------------------------------------------------------------------------------------------|-----------------------------------------------------------------------------------------|-------------------------------------------------------------------------------|-------------------------------------------------------------|-------------------------------------------------------------------------------------------------------------------------------------------|----------------------------------------------------------------------------------------------------------------------------------------|------------------|
| 332       | 26391941 | A Road Map to Address the Social Determinants of Health through Community Collaboration                                                                                                                                        | Social programs - Community health initiatives, educational programs                    | Community level - Community health outreach, local health education campaigns | Yes - Family-centered approaches, family counseling, family | Health outcomes - Improvement in health metrics, reduction in disease incidence                                                           | Demographic diversity - Effectiveness across age groups, ethnicities, socioeconomic statuses                                           |                  |
| 379       | 30649280 | Screening for Poverty and Intervening in a Primary Care Setting: An Acceptability and Feasibility Study                                                                                                                        | Social programs                                                                         | Hospital level                                                                | No                                                          | Provider perspectives on acceptability and feasibility                                                                                    | Unclear                                                                                                                                |                  |
| 445       | 36457714 | Impact of a Mobile Integrated Healthcare and Community Paramedicine Program on Improving Medication Adherence in Patients with Heart Failure and Chronic Obstructive Pulmonary Disease after Hospital Discharge: A Pilot Study | Resource allocation - Allocation of medical staff and equipment                         | Hospital level - Implemented after hospital discharge                         | No                                                          | Health outcomes - Medication adherence                                                                                                    | Unclear - Small sample size from one hospital                                                                                          |                  |
| 497       | 36068611 | Needs Assessment and Planning for a Clinic-Community-Based Implementation Program for Hypertension Control among Blacks in New York City: A Protocol Paper                                                                     | Social programs - Community health initiatives                                          | Community level - Community health outreach                                   | No                                                          | None - This is a protocol paper                                                                                                           | Not reported - Protocol paper                                                                                                          |                  |
| 525       | 20820029 | Medical-Legal Partnerships: Transforming Primary Care by Addressing the Legal Needs of Vulnerable Populations                                                                                                                  | Social programs - Medical-legal partnerships                                            | Community level - Integrated into primary care                                | No                                                          | Not reported - Descriptive article                                                                                                        | Not reported - Descriptive article                                                                                                     |                  |
| 540       | 31749028 | Impact of a Low-Intensity Resource Referral Intervention on Patients' Knowledge, Beliefs, and Use of Community Resources: Results from the Communityrx Trial                                                                   | Social programs - Resource referral intervention                                        | Hospital level - Implemented in primary care clinic and emergency department  | No                                                          | Knowledge and beliefs about community resources, resource self-efficacy, resource utilization                                             | Unclear - Single health system in one geographic area                                                                                  |                  |
| 543       | 33468104 | The Mitigating Toxic Stress Study Design: Approaches to Developmental Evaluation of Pediatric Health Care Innovations Addressing Social Determinants of Health and Toxic Stress                                                | Social programs - Pediatric clinic innovations to address social determinants of health | Hospital level - Implemented in pediatric clinics                             | Yes - Family-centered approaches                            | Not reported - Study protocol                                                                                                             | Unclear - Study protocol across multiple clinics and communities                                                                       |                  |
| 552       | 32527322 | Enhanced Care Planning and Clinical-Community Linkages Versus Usual Care to Address Basic Needs of Patients with Multiple Chronic Conditions: A Clinician-Level Randomized Controlled Trial                                    | Social programs - Enhanced care planning and community linkages                         | Community level - Implemented in primary care clinics                         | No                                                          | Health outcomes - Control of chronic conditions, quality of life                                                                          | Unclear - Single health system in one geographic area                                                                                  |                  |
| 557       | 32449443 | Impact of an on-Site Versus Remote Patient Navigator on Pediatricians' Referrals and Families' Receipt of Resources for Unmet Social Needs                                                                                     | Resource allocation - Patient navigator                                                 | Hospital level - Implemented in pediatric clinics                             | No                                                          | Referrals to patient navigator, contact with families, enrollment in resources                                                            | Unclear - Single patient navigator across few clinics                                                                                  |                  |
| 584       | 32392126 | Evaluation of the Learning to Integrate Neighborhoods and Clinical Care Project: Findings from Implementing a New Lay Role into Primary Care Teams to Address Social Determinants of Health                                    | Social program - Implementation of a community health worker role                       | Community/clinic level - Intervention implemented in primary care clinics     | No specific family or social support component              | Patient satisfaction, health outcomes (focus groups indicated improved health, but no changes detected in surveys or administrative data) | Unclear generalizability due to limited sample size and lack of randomization; provides lessons learned for implementing similar roles |                  |

|     |          |                                                                                                                                                                                                           |                                                                      |                                                           |                                                      |                                                                                                                                                  |                                                                                                                                       |
|-----|----------|-----------------------------------------------------------------------------------------------------------------------------------------------------------------------------------------------------------|----------------------------------------------------------------------|-----------------------------------------------------------|------------------------------------------------------|--------------------------------------------------------------------------------------------------------------------------------------------------|---------------------------------------------------------------------------------------------------------------------------------------|
| 603 | 30562141 | Mechanisms Associated with Clinical Improvement in Interventions That Address Health-Related Social Needs: A Mixed-Methods Analysis                                                                       | Social program - Linking patients to community resources             | Community/clinic level - Embedded in primary care clinics | No specific family or social support component       | Health outcomes (blood pressure, LDL, A1c), patient satisfaction, resource utilization                                                           | Unclear generalizability due to single health system; provides qualitative insights into mechanisms                                   |
| 608 | 36754720 | Reducing Barriers to Covid-19 Vaccine Uptake through a Culturally Sensitive Pharmacy-Led Patient Medication Education Group in a Behavioral Health Population                                             | Social program - Culturally sensitive pharmacy-led education program | Hospital level - Behavioral health facility               | No specific family or social support component       | Health outcomes (vaccine uptake rates), patient satisfaction                                                                                     | Unclear generalizability due to single site; provides insights into addressing vaccine hesitancy                                      |
| 632 | 33779065 | Use of an Integrated Care Management Program to Uncover and Address Social Determinants of Health for Individuals with Lupus                                                                              | Social program - Integrated care management program                  | Hospital level - Academic medical center                  | No specific family or social support component       | Patient satisfaction, access and equity (uncovering and addressing social needs)                                                                 | Unclear generalizability due to single academic medical center                                                                        |
| 670 | 35759702 | Nonmedical Interventions for Type 2 Diabetes: Evidence, Actionable Strategies, and Policy Opportunities                                                                                                   | Social programs, policy changes                                      | Community, city/regional, hospital                        | No specific family or social support                 | Health outcomes (HbA1c, blood pressure, cholesterol), access and equity                                                                          | Unclear generalizability due to limited evidence base; provides framework for policy opportunities                                    |
| 688 | 36999452 | 2022 Ashp Survey of Health-System Specialty Pharmacy Practice: Clinical Services                                                                                                                          | Resource allocation - Health system specialty pharmacy services      | Hospital level - Within health systems                    | No specific family or social support                 | Patient satisfaction, health outcomes, economic (cost savings)                                                                                   | Unclear generalizability due to convenience sample; provides overview of services offered by health system specialty pharmacies       |
| 691 | 32548774 | Demonstrated Health Care Cost Savings for Women: Findings from a Community Health Worker Intervention Designed to Address Depression and Unmet Social Needs                                               | Social program - Community health worker intervention                | Hospital/clinic level - Urban women's health clinics      | No specific family/social support component          | Economic (healthcare costs), access and equity (unmet social needs)                                                                              | Single health system - unclear generalizability; provides evidence for cost savings of CHW intervention                               |
| 718 | 32305457 | Translating Research into Practice: Protocol for a Community-Engaged, Stepped Wedge Randomized Trial to Reduce Disparities in Breast Cancer Treatment through a Regional Patient Navigation Collaborative | Social program - Patient navigation services                         | Hospital level - Academic medical centers                 | No specific family or social support                 | Health outcomes (treatment timeliness, guideline concordance), implementation outcomes (acceptability, adoption, fidelity, sustainability, cost) | Unclear generalizability as the protocol is for a single region; provides model for addressing disparities through patient navigation |
| 721 | 31460769 | Group Medical Visits 2.0: The Open Source Wellness Behavioral Pharmacy Model                                                                                                                              | Social program - Group education and coaching sessions               | Community level - Federally qualified health center       | Yes - Peer support and social connections emphasized | Health outcomes (blood pressure, BMI, depression), access and equity (targeting underserved populations)                                         | Single health center - unclear generalizability; provides model for behavioral pharmacy                                               |
| 760 | 36054022 | Targeting Technology in Underserved Adults with Type 1 Diabetes: Effect of Diabetes Practice Transformations on Improving Equity in Cgm Prescribing Behaviors                                             | Resource allocation - Diabetes practice transformations              | Hospital level - Endocrinology clinics                    | No specific family or social support                 | Health outcomes (CGM prescription rates), access and equity (focus on underserved populations)                                                   | Single health system - unclear generalizability; provides model for practice transformations                                          |
| 708 | 37007375 | Effects of California's New Patient Homelessness Screening and Discharge Care Law in an Emergency Department                                                                                              | Policy Changes                                                       | Hospital Level                                            | No specific mention                                  | Health Outcomes (ED visit rates, demographic shifts), Access and Equity (identification of homeless)                                             | Demographic Diversity (age, sex, race), Geographic Transferability (specific to suburban California ED)                               |
| 534 | 36704207 | Evaluating a Social Risk Screening and Referral Program in an Urban Safety-Net Hospital Emergency Department                                                                                              | Social program - Social Risk Screening and Referral Program          | Hospital Level                                            | No                                                   | Patient's perspectives on acceptability and feasibility                                                                                          | Not reported - Feasibility paper                                                                                                      |

Type of intervention (e.g., policy changes, social programs, resource allocation).

Level at which the intervention is targeted (e.g., hospital, community, city).

Incorporation of family or social support in the intervention.

Metrics used to determine the effectiveness of the intervention.

Generalizability of the intervention outcomes.
